---

# A SEMI-SUPERVISED BAYESIAN MIXTURE MODELLING APPROACH FOR JOINT BATCH CORRECTION AND CLASSIFICATION

---

STEPHEN COLEMAN<sup>\*,1</sup>, XAQUIN CASTRO DOPICO<sup>2</sup>, GUNILLA B. KARLSSON HEDESTAM<sup>2</sup>,

PAUL D.W. KIRK<sup>†,1,3</sup>, CHRIS WALLACE<sup>†,1,3</sup>

<sup>1</sup> MRC Biostatistics Unit, University of Cambridge, U.K.

<sup>2</sup> Department of Microbiology, Tumor and Cell Biology, Karolinska Institutet, Sweden.

<sup>3</sup> Cambridge Institute of Therapeutic Immunology & Infectious Disease, University of Cambridge, U.K.

## ABSTRACT

1  
2 Systematic differences between batches of samples present significant challenges when  
3 analysing biological data. Such *batch effects* are well-studied and are liable to occur in  
4 any setting where multiple batches are assayed. Many existing methods for accounting for  
5 these have focused on high-dimensional data such as RNA-seq and have assumptions that  
6 reflect this. Here we focus on batch-correction in low-dimensional classification problems.  
7 We propose a semi-supervised Bayesian generative classifier based on mixture models that  
8 jointly predicts class labels and models batch effects. Our model allows observations to  
9 be probabilistically assigned to classes in a way that incorporates uncertainty arising from  
10 batch effects. We explore two choices for the within-class densities: the multivariate nor-  
11 mal and the multivariate  $t$ . A simulation study demonstrates that our method performs  
12 well compared to popular off-the-shelf machine learning methods and is also quick; per-  
13 forming 15,000 iterations on a dataset of 500 samples with 2 measurements each in 7.3  
14 seconds for the MVN mixture model and 11.9 seconds for the MVT mixture model. We

---

\* Corresponding author: [stephen.coleman@mrc-bsu.cam.ac.uk](mailto:stephen.coleman@mrc-bsu.cam.ac.uk)

† These authors provided an equal contribution.

## A semi-supervised Bayesian mixture modelling approach for joint batch correction and classification

---

15 apply our model to two datasets generated using the enzyme-linked immunosorbent assay  
16 (ELISA), a spectrophotometric assay often used to screen for antibodies. The examples  
17 we consider were collected in 2020 and measure seropositivity for SARS-CoV-2. We use  
18 our model to estimate seroprevalence in the populations studied. We implement the mod-  
19 els in C++ using a Metropolis-within-Gibbs algorithm; this is available in the R package at  
20 <https://github.com/stcolema/BatchMixtureModel>. Scripts to recreate our analysis  
21 are at <https://github.com/stcolema/BatchClassifierPaper>.

22 **Keywords** SARS-CoV-2 · ELISA · Mixture model · Batch correction · Bayes · Assay data · Classification.

## 23 1 Background

24 Many biological assays are performed across sets of samples or *batches*. When the number of samples  
25 exceeds the batch size, then it is common to notice *batch effects*, systematic differences between assay  
26 readouts from different batches which may affect both their mean and scale. This is a prevalent problem,  
27 that may be addressed in a variety of ways depending on the planned downstream analysis. In discussing  
28 available options for batch correction, we will use the term “batch effect” to mean differences between  
29 samples arising from between-batch technical factors in the experiment, and the term “class effect” to refer  
30 to biological differences arising due to samples coming from distinct biological classes. We consider settings  
31 in which the objective is to classify unlabelled samples into predefined classes.

32 To analyse class effects we should also account for the batch effects. One common approach is to first correct  
33 for batch effects as part of a pre-processing or data cleaning step (which might be as simple as zero-centring  
34 the data; i.e., transforming each batch to have a common mean), and then to apply standard classification  
35 models to the resulting “cleaned” data (e.g., 2, 25, 32). However, such two-step approaches have been found  
36 to increase false positive rates because they may induce correlation between the cleaned observations which  
37 is typically not accounted for in downstream analysis (23). Further, when batch is confounded with class  
38 effects (due to unbalanced representation of classes across batches) then naive adjustment which ignores  
39 known biological classes in the data can lead to incorrect conclusions (22), and methods for adjustment  
40 which preserve differences attributable to known classes can lead to false positive results (29). An alternative  
41 approach is to incorporate batch information directly into downstream analyses, for example as a covariate in  
42 regression-based approaches. It has been shown that mixed effects models which share information between  
43 batches produce better calibrated quantitative data than independent analyses of each batch (35). However,  
44 only a subset of analytical approaches have been adapted to accommodate batch effects (e.g., 28, 30, 21),

## A semi-supervised Bayesian mixture modelling approach for joint batch correction and classification

---

45 and there has been a strong focus on high-dimensional settings (e.g., 17, 6, 1). Thus a need exists for a wider  
46 range of methods that can account for batch effects directly in low-dimensional data analysis.

47 Here we focus on the problem of assigning class labels using low-dimensional assay data generated across  
48 several batches. This is a common design in many assays that measure a small number of specific biomark-  
49 ers such as enzyme-linked immunosorbent assay (ELISA) and flow cytometry data. If there are known  
50 classes in the population, then class-specific controls can be included in the assay, resulting in training ex-  
51 amples for which the class labels are known. We are motivated in part by the specific problem of estimating  
52 seroprevalance of SARS-CoV-2 by classifying individuals into seropositive and seronegative classes at dif-  
53 ferent points in time during the pandemic. Since batches tend to comprise samples collected at the same  
54 time point, and since seroprevalance is expected to vary through the course of the pandemic, we expect  
55 class membership to be imbalanced across batches – motivating the development of a joint classification  
56 and batch-correction model, rather than a 2-step approach. Insofar as we are aware, there is no appropriate  
57 method for classification using data with all of these characteristics.

58 To address this, we propose a semi-supervised Bayesian mixture model that explicitly models batch param-  
59 eters and predicts class membership. The semi-supervised aspect means that observed labels from positive  
60 and negative controls are used in the model. The Bayesian framework allows our model to propagate the  
61 uncertainty arising from the batch effects to the class allocation probabilities for each item in the dataset.  
62 This provides a more complete quantification of the uncertainty in the final predictions, thereby enabling  
63 more informed interpretation.

64 This manuscript is organised as follows: in section 2 we describe our model; in section 3 we evaluate  
65 our model using simulated data, and compare to off-the-shelf machine learning methods; and in section 4  
66 we apply the proposed method to two ELISA studies of seroprevalance of SARS-CoV-2 in Stockholm (7)  
67 (section 4.1) and Seattle (11) (section 4.3). We then conclude our manuscript in section 5 with a discussion  
68 of the contribution, limitations, and possible extensions to our model.

## 69 **2 Model**

### 70 **2.1 Notation**

71 We consider a study that collects  $P$  measurements for each of  $N$  individuals to form a dataset  $X =$   
72  $(X_1, \dots, X_N)$ , where  $X_n = [X_{n,1}, \dots, X_{n,P}]^\top$  for all  $n \in \{1, \dots, N\}$ . We assume that each individ-  
73 ual has an associated observed batch label  $b_n \in \{1, \dots, B\} \subset \mathbb{N}$ , where  $B$  is the total number of batches,  
74 and we write  $b = [b_1, \dots, b_N]^\top$  for the collection of all  $N$  batch labels. Note that as each individual belongs

## A semi-supervised Bayesian mixture modelling approach for joint batch correction and classification

---

75 to a single batch, we assume that all  $P$  measurements for each individual are part of the same batch. We  
 76 wish to predict class labels for each individual, and write  $c = [c_1, \dots, c_N]^\top$  for the collection of all class  
 77 labels. We assume that the number of classes,  $K$ , is known, so that each  $c_n \in \{1, \dots, K\}$ , and introduce a  
 78 binary vector  $\phi = [\phi_1, \dots, \phi_N]^\top$ , such that  $\phi_n = 1$  if and only if  $c_n$  is known.

### 79 **2.2 Model specification**

We use a  $K$ -component mixture model to describe the data  $X$ . The mixture model can be written

$$p(X_n) = \sum_{k=1}^K \pi_k f(X_n | \theta_k) \quad \text{independently for each } n = 1, \dots, N, \quad (1)$$

where  $\pi = [\pi_1, \dots, \pi_K]^\top$  is the vector of component weights,  $f(\cdot)$  is a parametric density function, and  $\theta_k$  are the parameters of the  $k^{\text{th}}$  component. We assume each component describes a single and distinct class in the population and use the class labels to rewrite the model

$$p(X_n | c_n = k) = f(X_n | \theta_k). \quad (2)$$

We then introduce batch-specific parameters,  $z = (z_1, \dots, z_B)$  and expand  $f(\cdot)$  to accommodate these. Then conditioning on the observed batch label we have

$$p(X_n | c_n = k, b_n = b) = f(X_n | \theta_k, z_b). \quad (3)$$

80 We focus on continuous data where each measurement has support across the entire real line. We consider  
 81 the multivariate  $t$  density (MVT, density denoted  $f_t(\cdot)$ ) and the multivariate normal (MVN, density denoted  
 82  $f_{\mathcal{N}}(\cdot)$ ) as choices for  $f$ , but depending on the situation other choices could be more relevant and our model  
 83 is not inherently restricted to these. We use  $z_b = (m_b, S_b)$ , choosing  $m_b$  to be a  $P$ -vector representing the  
 84 shift in location due to the batch effects and  $S_b$  to be a scaling matrix. We assume the observed location of  
 85  $X_n$  is composed of a class-specific effect,  $\mu_k$ , and a batch-specific effect,  $m_b$ , so  $(X_n | c_n = k, b_n = b) =$   
 86  $\mu_k + m_b + \epsilon_n$ . Similarly we assume that the random noise,  $\epsilon_n$ , is subject to class and batch specific effects  
 87  $\Sigma_k$  and  $S_b$  respectively.

More specifically, if we use a mixture of MVN densities, then our class parameters are  $\theta_k = (\mu_k, \Sigma_k)$ , where  $\mu_k$  is the  $P$ -dimensional mean vector and  $\Sigma_k$  is the  $P \times P$  covariance matrix. We assume

$$X_n | c_n = k, b_n = b \sim \mathcal{N}(\mu_k + m_b, \Sigma_k \oplus S_b). \quad (4)$$

## A semi-supervised Bayesian mixture modelling approach for joint batch correction and classification

---

We define the operator  $\oplus$  for a  $P \times P$  matrix,  $A$ , and a diagonal matrix  $B$  of equal dimension, as:

$$A \oplus B := \begin{pmatrix} a_{1,1}b_{1,1} & a_{1,2} & a_{1,3} & \cdots & a_{1,P} \\ a_{2,1} & a_{2,2}b_{2,2} & a_{2,3} & \cdots & a_{2,P} \\ a_{3,1} & a_{3,2} & a_{3,3}b_{3,3} & \cdots & a_{3,P} \\ \vdots & \vdots & \vdots & \ddots & \vdots \\ a_{P,1} & a_{P,2} & a_{P,3} & \cdots & a_{P,P}b_{P,P} \end{pmatrix}. \quad (5)$$

Similarly for a mixture of MVT densities, we assume

$$X_n | c_n = k, b_n = b \sim t_{\eta_k}(\mu_k + m_b, \Sigma_k \oplus S_b). \quad (6)$$

88 where  $\eta_k$  is the class-specific degrees of freedom.

89 In the likelihood function, only the combinations of the class and batch parameters,  $\mu_k + m_b$  and  $\Sigma_k \oplus S_b$ ,  
 90 are identifiable, and the values of the class and batch specific effects are not. However, we assume that we  
 91 have some prior information about the relative orders of magnitude of the class and batch effects and encode  
 92 this in an informative prior, reducing the problem of identifiability with this additional constraint. If the  
 93 magnitude of the between-batch variability is similar to or greater than the true biological effect, then we  
 94 suspect that any analysis of such a dataset is untenable, or at least that the data are not appropriate for our  
 95 model.

The full hierarchical model can be found in section 1 of the supplementary material. Here we include the choice of prior distributions for the class and batch effects:

$$\mu_k, \Sigma_k | \xi, \kappa, \nu, \Psi \sim \mathcal{N}\left(\mu_k | \xi, \frac{\Sigma_k}{\kappa}\right) \mathcal{IW}(\Sigma_k | \nu, \Psi), \quad (7)$$

$$m_{b,p} | \delta^2 \sim \mathcal{N}(0, \lambda \delta^2), \quad (8)$$

$$(S_b)_{p,p} | \alpha, \beta, S_{loc} \sim \mathcal{IG}(\alpha, \beta, S_{loc}), \quad (9)$$

$$\eta_k \sim \mathcal{G}(\epsilon, \zeta) \quad (\text{if the MVT density is being used}). \quad (10)$$

96  $\mathcal{IW}$  denotes the inverse-Wishart distribution,  $\mathcal{IG}$  denotes the inverse-Gamma distribution with a shape  
 97  $\alpha$ , rate  $\beta$  and location  $S_{loc}$ ,  $\mathcal{N}$  signifies the Gaussian distribution parameterised by a mean vector and a  
 98 covariance matrix and  $\mathcal{G}$  denotes the Gamma distribution parameterised by a shape and rate. An empirical  
 99 Bayes approach is used to set the hyperparameters for the class mean and covariance (details are included in  
 100 section 2 of the Supplementary material, these follow the suggestions of 13). The  $\delta^2$  hyperparameter is set  
 101 to the mean of the diagonal entries of the observed covariance in the data.  $S_{loc}$  is set to 1.0 to ensure that the

## A semi-supervised Bayesian mixture modelling approach for joint batch correction and classification

---

102 likelihood covariance matrix remains positive semi-definite. For the MVT mixture model, we choose the  
103 hyperparameters of the degrees of freedom to be  $\epsilon = 20$   $\zeta = 0.1$  in line with suggestions from Juárez and  
104 Steel (19). This uninformative prior does not restrict  $\eta_k$  to small values, and enables the MVT mixture model  
105 to approximate the MVN model if the data are truly Gaussian. The remaining hyperparameters ( $\lambda$ ,  $\alpha$  and  $\beta$ )  
106 are user-specified, and we explore the impact of different choices on the final inference in sections 4.1 and  
107 4.3. We investigate the impact of 3 different values for each of these parameters, reflecting an informative  
108 or constrained prior, a flexible, uninformed prior, and a choice in the middle-ground.

Sampling the batch and class parameters allows us to derive a batch-corrected dataset,  $Y$ , in each iteration.  
We define the  $p^{th}$  measurement for the  $n^{th}$  sample in  $Y$  as

$$(Y_{n,p} | c_n = k, b_n = b, \dots) = \frac{X_{n,p} - m_{b,p} - \mu_{k,p}}{(S_b)_{p,p}} + \mu_{k,p}, \quad (11)$$

109 for all  $n = \{1, \dots, N\}$ ,  $p = \{1, \dots, P\}$ . Note that  $Y$  will incorporate the uncertainty about the batch  
110 and class parameters, and the classification. This transformation is similar to the empirical Bayes batch  
111 correction suggested by Johnson et al. (18); however their method is a pre-processing step that is applied to  
112 each measurement in turn, whereas our model is jointly inferring class and batch effects and may be applied  
113 to the full dataset.

114 We perform inference using a Metropolis-within-Gibbs sampler as described in section 3 of the supplemen-  
115 tary material.

## 116 3 Simulations

### 117 3.1 Simulation design

118 We wish to evaluate the performance of the MVN and MVT implementations of our model and compare  
119 these to the popular machine learning methods random forest (**RF**, 5), probabilistic support vector machine  
120 (**SVM**, 4) and logistic regression (without batch-correction, **LR**). We also include the case where each batch  
121 is separately mean centred and transformed to have unit variance with logistic regression then applied (**LR**  
122 - **BC**), to show the limitations of a naive batch correction. Our primary interest is in the ability of each  
123 method to infer the correct class, the uncertainty quantification about the classification point estimate and  
124 time to run the models. We are also interested in inferring the proportion of the second (smaller) class in the  
125 dataset; this is the same as seroprevalence in our real data examples.

## A semi-supervised Bayesian mixture modelling approach for joint batch correction and classification

---

126 To achieve this, we generate 10 datasets in each of 6 different scenarios. In all but one the data are generated  
127 from a mixture of MVN distributions. We intend that the underlying class structure, once free of batch ef-  
128 fects, is identifiable. Our aim is to show the importance of integrating batch correction into the classification  
129 method, since the success of Bayesian mixture models for classification (this has previously been demon-  
130 strated, see, e.g. 10). For each simulation we generate both a “batch-free” and an observed dataset. Each  
131 contains  $P = 2$  measurements for each of 500 samples. The “batch-free” dataset is the observed dataset less  
132 the batch effects. It represents solely the influence of the class parameters. The class parameters are chosen  
133 to give a separation of 4 between the mean parameters in each dimension (e.g.,  $\mu_{1,1} = -2, \mu_{2,1} = 2$ ). We  
134 set the covariance matrix to  $\sigma^2 \mathbf{I}$ , where  $\sigma = 1.25$  in each class. In the default setting, our “Base case”,  
135 we generate data from 5 batches. The entries of each batch shift were restricted to one of two options,  
136  $m_{b,p} \in (-0.5, 0.5)$ . Similarly,  $S_{b,p} \in (1.2, 1.5)$ . The class weights are uneven, with the first class expected  
137 to contribute 75% of the samples with the remainder drawn from class 2. In this scenario the batches are  
138 all expected to have equal numbers of samples. We randomly select which class labels are observed, sam-  
139 pling uniformly across the data indices,  $\{1, \dots, N\}$ . We expect one quarter of the labels to be observed, i.e.  
140  $\mathbb{E} \left( \sum_{n=1}^N \phi_n \right) = 0.25N = 125$ . These labelled observations constitute the training set for the off-the-shelf  
141 methods.

142 Our six simulation scenarios are:

- 143 • Base case: The generic, base scenario; all other scenarios are variations of this, using the same  
144 choices for all but a subset of parameters, with this subset varied to define the specific scenario.
- 145 • Batch-free: Similar to the Base case but no batch effects are present (i.e.,  $m_b = \mathbf{0}_P, S_b = \mathbf{I}$ ).
- 146 • Varying batch effects: the Base case with more variance among the batch effects,  $m_{b,p} \in$   
147  $(-1.5, -0.5, 0.0, 0.5, 1.5), S_{b,p} \in (1.0, 1.25, 1.5, 1.75, 2.25)$ .
- 148 • Varying class representation: the classes are imbalanced across batches, i.e, the expected proportion  
149 of each class varies across batches (note that this is a slightly different generating model, the class  
150 weights are batch specific). The first two batches contain a larger proportion of samples from class  
151 1, the third batch is balanced and the final two batches have a greater proportion of samples from  
152 class 2.
- 153 • Varying batch size: rather than equally sized batches, the batches have varying proportions of the  
154 total sample. The expected proportions are  $\frac{1}{2}, \frac{1}{4}, \frac{1}{8}, \frac{1}{16}, \frac{1}{16}$ .

## A semi-supervised Bayesian mixture modelling approach for joint batch correction and classification

- 155 • Multivariate t generated: the data are generated from a MVT mixture model rather than a MVN  
156 mixture model. One class is generated from a MVT with 3 degrees of freedom, the other has 5  
157 degrees of freedom.

158 The parameters that differentiate the scenarios are summarised in table 1, with a more detailed description,  
159 along with visualisations of an example dataset for each scenario, provided in section 4 of the supplementary  
160 material.

| Scenario                     | $B$ | Class weights | $m_b$     | $S_b$  | Batch weights | $\eta$ |
|------------------------------|-----|---------------|-----------|--------|---------------|--------|
| Base Case                    | 5   | Across batch  | $\pm 0.5$ | 1.2    | Constant      | NA     |
| Batch-free                   | 1   | Across batch  | 0.0       | 1.0    | Constant      | NA     |
| Varying class representation | 5   | Within batch  | $\pm 0.5$ | 1.2    | Constant      | NA     |
| Varying batch effects        | 5   | Across batch  | Varied    | Varied | Constant      | NA     |
| Varying batch size           | 5   | Across batch  | $\pm 0.5$ | 1.2    | Varying       | NA     |
| MVT generated                | 5   | Across batch  | $\pm 0.5$ | 1.2    | Constant      | (3, 5) |

Table 1: Defining parameters of each simulation scenario.

161 We use implementations of the machine learning methods available in R (31). For the RF this is the  
162 `randomForest` package (24), for the SVM we use the `kernlab` package (20), and for LR we use the  
163 base implementation of LR contained in the `glm` function. We use the default parameters in each method,  
164 bar the SVM where we set `prob.model = TRUE` to build a model for calculating class probabilities. The  
165 default for a classification SVM in this package uses a Gaussian Radial Basis kernel function.

166 We use the data with observed labels as the training set for each of these methods and those with unobserved  
167 labels as a test set. We record the time taken to train the model and to predict the outcome for the test set.

### 168 3.2 Results

169 We assessed within-chain convergence by calculating the Geweke statistic (15), and removed chains which  
170 failed the diagnostic test. We then considered the trace plots for the complete log-likelihood in the remaining  
171 chains as a visual check to identify chains that had not converged. An example of the sequential reductions  
172 in chains by this process is shown in figures 8 and 9 of section 5 of the supplementary material.

173 We compared the models using the F1 score, considering the difference between the predicted labels to  
174 the true classes, and the squared Euclidean distance between the allocation probability matrix (a  $N \times K$   
175 matrix) to the one-hot-encoding of the true classes (figure 1 A and B). We found that our mixture model  
176 performed better or at least as well as the ML methods across all scenarios. When the data were generated  
177 from Gaussian distributions, the performance of the two versions of the mixture model performed very  
178 similarly. The MVT mixture model learned a large degree of freedom for each component, indicating that



## A semi-supervised Bayesian mixture modelling approach for joint batch correction and classification

---

179 this behaves as an approximation of the Gaussian mixture model when appropriate (figure 2). In contrast, in  
180 the Multivariate  $t$  generated scenario, the performance of the MVN mixture model had greater variation in  
181 performance than in any other scenario. Figure 2 also shows that parameter estimates were consistent across  
182 chains.

183 We also wanted a sense of how well our models would estimate the “seroprevalence” in our simulations. In  
184 this case we defined seroprevalence as the proportion of the smaller class in the dataset, and compared the  
185 models’ estimate to the truth (figure 1 C). We found that the mixture models have a more narrow range in  
186 their estimates than the other models in the Base case, No batch effects, Varying batch effects and Varying  
187 batch size scenarios, with a similar range for the MVT mixture model in the other two scenarios indicating  
188 a more consistent behaviour than the other methods. The MVN mixture model exhibited good behaviour,  
189 except when misspecified as in the MVT generated data. We note that the MVT mixture model’s estimate  
190 tended to be either centred on the true value (MVT generated, No batch effects, Varying class representation  
191 in figure 1 C) or else to be slightly lower (Base case, Varying batch effects, Varying batch size in figure 1  
192 C). We also observed that when the batch effects were more varied and greater in magnitude, the SVM and  
193 RF had very long tails in their performance (Varying batch effects in figure 1 C). We saw similar behaviour  
194 for LR - BC in the F1 score and distance; the imbalance of classes across batches caused the naive batch-  
195 correction to be misleading and hence the method performed poorly. LR (without batch correction) was  
196 probably the strongest contender to the MVT mixture model in most of our scenarios. This method provided  
197 an estimate close to the true value in many simulations, but it has a wider range in its performance across  
198 simulations than the MVT.

199 Logistic regression applied after a batch correction matched the mixture model in performance in three  
200 settings: the Base case, the Varying batch effects and the Varying batch size scenarios. However, when  
201 the classes were imbalanced across batches, as in the varying class representation scenario, this naive batch  
202 correction method performed the worst of all methods. This behaviour for a pre-processing batch correction  
203 step and its disadvantages compared to incorporating the batch correction into the modelling is in keeping  
204 with results from Leek et al. (22), Li et al. (23).

205 The Varying class representation scenario was also the setting in which the off-the-shelf methods performed  
206 most similarly to our model under the F1 score, but under the squared Euclidean distance our mixture model  
207 still performed better, suggesting that the items misclassified by the mixture models had a high uncertainty  
208 associated with their classification.

## A semi-supervised Bayesian mixture modelling approach for joint batch correction and classification

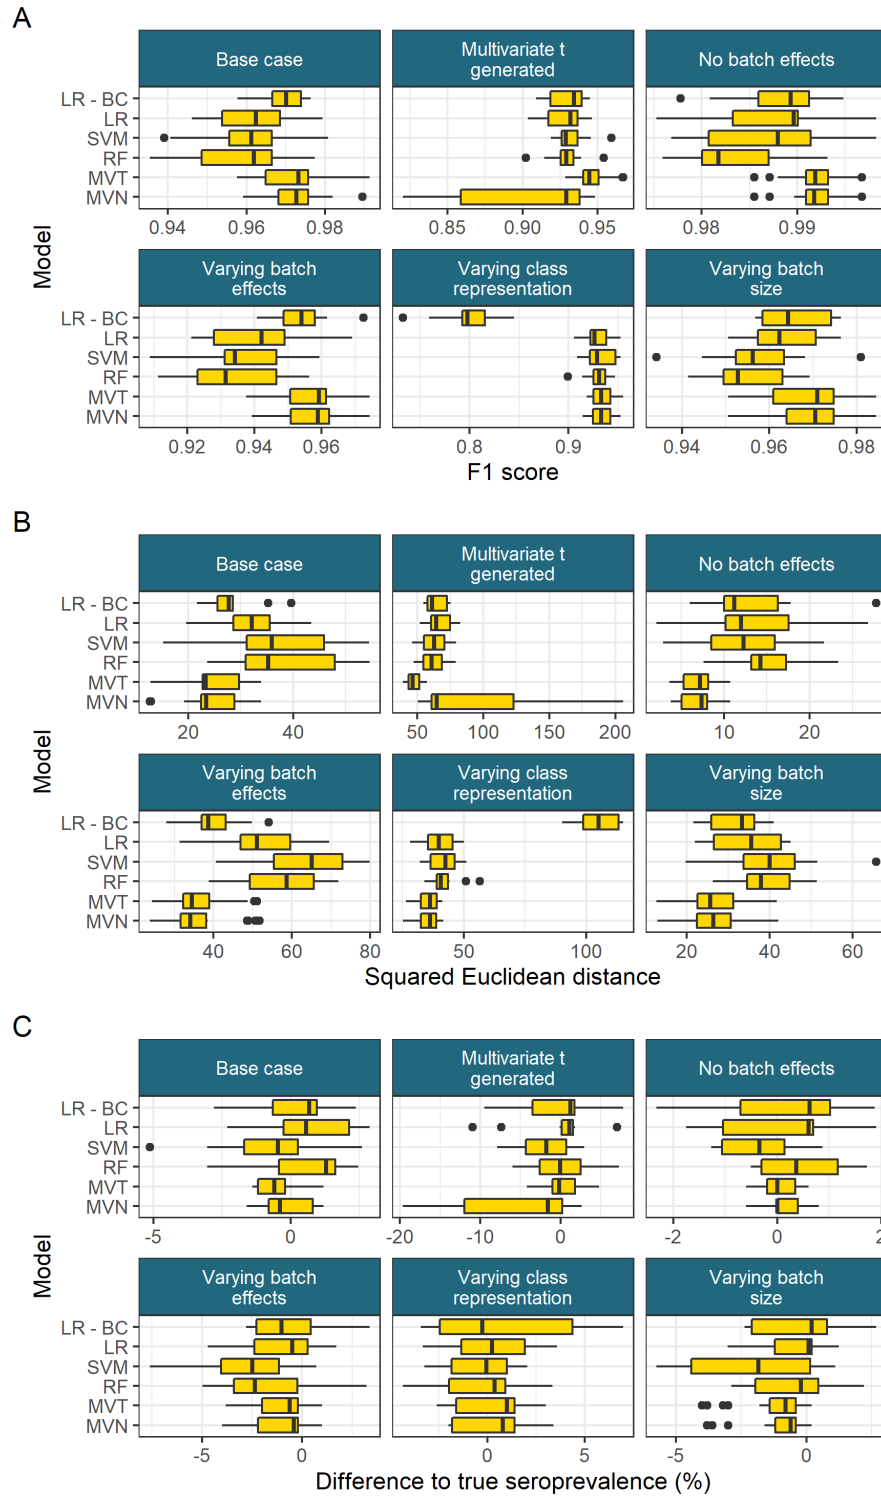

Figure 1: A) F1 score for the predicted classification to the true allocation in test datasets across simulations. B) Squared Euclidean distance between the allocation probability matrix and a one-hot-encoding of the true labels. C) The difference between the point estimate of seroprevalence and the truth across simulations.

## A semi-supervised Bayesian mixture modelling approach for joint batch correction and classification

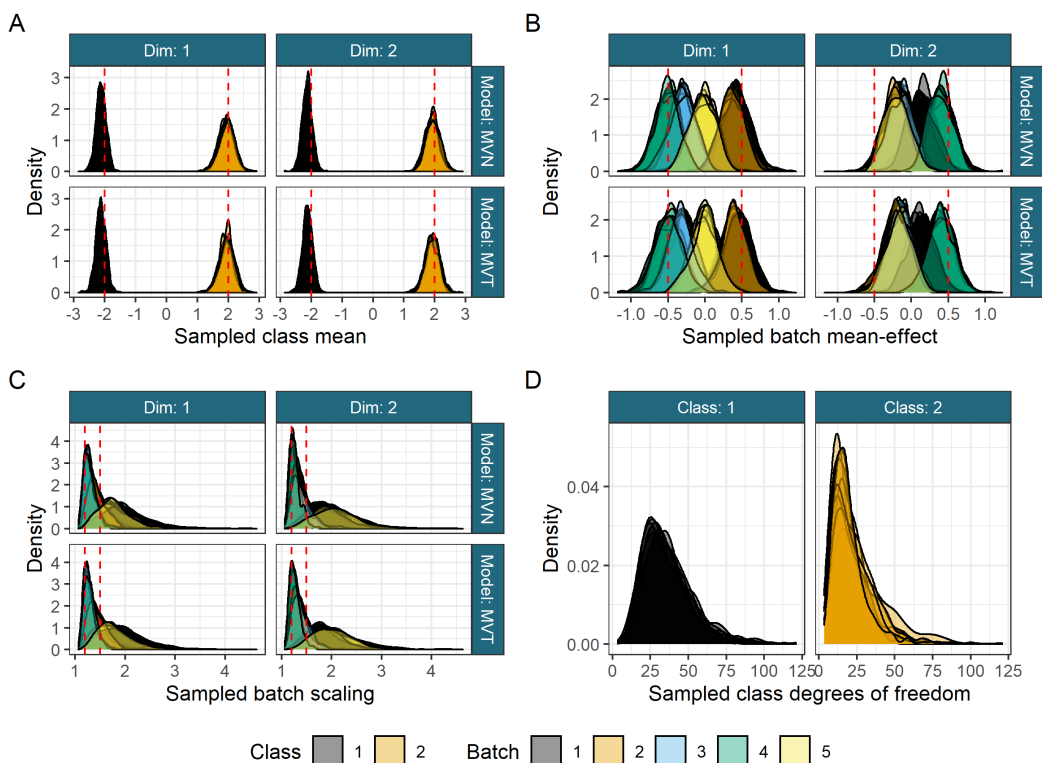

Figure 2: Sampled values for A) the class means, B) the batch mean-effect, C) the batch scaling effect and D) the class degrees of freedom for the well-behaved chains for the first simulated dataset in the Base case scenario. True values are shown by the dashed red vertical lines (as the data are generated from a MVN density there is no true degree of freedom, but larger values better approximate the MVN).

209 MCMC was slower than the machine learning approaches (table 2), but still reasonable, taking only 7  
 210 seconds for 15,000 MCMC iterations (more than enough for chains to converge) for the MVN mixture  
 211 model and less than 12 seconds for the MVT.

| Model | Average time (seconds) |
|-------|------------------------|
| LR    | 0.003                  |
| RF    | 0.027                  |
| SVM   | 0.049                  |
| MVN   | 7.28                   |
| MVT   | 11.9                   |

Table 2: Average time for each model to converge or, for the Bayesian models, to perform 15,000 iterations across all model runs.

## 212 4 ELISA data examples

213 ELISA is an immunological assay used to measure antibodies, antigens, proteins and glycoproteins, and  
 214 normally involves a reaction that converts the substrate into a coloured product, the optical density (OD)

## A semi-supervised Bayesian mixture modelling approach for joint batch correction and classification

---

215 which can be measured and is then used to determine the antigen concentration. One application is to assess  
216 seroprevalence of a disease within a population by measuring seropositivity of antibodies. It has a history of  
217 application to a wide range of diseases (e.g., 34, 3, 16, 27) and was used extensively to study seropositivity  
218 of antibodies to SARS-CoV-2 antigens used to estimate prevalence of cumulative infection and immunity  
219 (11, 26, 33). In such cases it is often possible to include known positive and negative controls as samples  
220 (these might be PCR-positive patients and historical samples collected before the pandemic began) and thus  
221 a subset of labels are observed.

222 We investigated the performance of our model on two recent examples of ELISA data, both from studies  
223 estimating seroprevalence of SARS-CoV-2. Based on the results from the simulations, we use the MVT as  
224 our choice of density, as it always matched or outperformed the MVN mixture in simulations (figure 1).

225 In the ELISA datasets we do not know the true seropositive status for the non-control data and cannot  
226 evaluate the model accuracy. Rather, we present these to demonstrate application of our model and highlight  
227 how diagnostic plots and results may be interpreted. In each case we run multiple chains and then use the  
228 sampled log-likelihood to assess within and across chain convergence.

229 Traditional analysis of ELISA data in seroprevalence studies makes dichotomous calls according to thresh-  
230 olds based on the sum of the sample mean and some number of standard deviations of the negative controls  
231 in each measurement. However, various choices of the number of standard deviations to use to define the  
232 decision boundary are present in the literature (e.g., compare 11, 26, 33).

### 233 **4.1 Carlos Dopico *et al.*, 2021**

234 We used the dataset available from Castro Dopico *et al.* (7), with the *group* variable representing the batch  
235 divisions. This dataset comprises the log-transformed normalised OD for IgG responses against stabilized  
236 trimers of the SARS-CoV-2 spike glycoprotein (SPIKE) and the smaller receptor-binding domain (RBD)  
237 in 2,100 sera samples from blood donors, 2,000 samples from pregnant volunteers, 595 historical negative  
238 controls, repeatedly sampled, and 149 PCR-positive patients (positive controls from 8). The data were  
239 generated across seven batches, with the positive controls contained in two of these. This, combined with our  
240 expectation that seropositivity should increase with time as more of the population were exposed to SARS-  
241 CoV-2, suggests that the batch and seropositivity frequency are dependent. Based on our simulation study,  
242 we would expect that a pre-processing batch normalisation would therefore produce misleading results.

243 We ran five chains of the MVT mixture model for 50,000 iterations for each of nine combinations of different  
244 choices for the hyperparameters of the batch effects in the model (choices in table 3, distributions in figure

## A semi-supervised Bayesian mixture modelling approach for joint batch correction and classification

245 3 A and B). The first 20,000 samples were removed as burn-in, and we thinned to every 100th sample to  
246 reduce auto-correlation.

|           | Value |      |      |      |      |      |      |      |      |
|-----------|-------|------|------|------|------|------|------|------|------|
| $\alpha$  | 1     | 5    | 10   | 1    | 5    | 10   | 1    | 5    | 10   |
| $\beta$   | 3     | 11   | 21   | 3    | 11   | 21   | 3    | 11   | 21   |
| $\lambda$ | 0.01  | 0.01 | 0.01 | 0.10 | 0.10 | 0.10 | 1.00 | 1.00 | 1.00 |

Table 3: Hyperparameter combinations used in analysing the data from Castro Dopico et al. (7). The prior expected value of the batch scaling effect is the same for all choices of  $\alpha$  and  $\beta$ . The choice of  $\lambda$  represents the scale we *a priori* expect for the batch shift effect.

247 We chose a representative chain for each hyperparameter combination to estimate the seroprevalence for  
248 each week of the year 2020 for which samples are available and compared these to the estimates from  
249 Castro Dopico et al. (7) (figure 3 C). Our point estimate was the mean posterior probability of allocation for  
250 the non-control data. This was highly consistent across hyperparameter choices and was contained within  
251 the confidence interval of the estimate provided by Castro Dopico et al. (7). However, our seroprevalence  
252 point estimates, particularly in later dates, were higher than the those from Castro Dopico et al. (7). Table 1  
253 of the Supplementary material shows the point estimate from the ML methods used in the Simulation study,  
254 our MVT mixture model and that from the original paper. This shows that while our method provides higher  
255 point estimates than those from Castro Dopico et al. (7), the other ML methods (barring the SVM) provide  
256 estimates much closer to or even exceeding that from the MVT.

257 The seroprevalence estimates and their credible intervals were almost identical across hyperparameter  
258 choices, suggesting that the classification results are robust to different choices for these hyperparameters.  
259 We took a single chain with hyperparameter choice  $\alpha = 5$ ,  $\beta = 11$  and  $\lambda = 0.1$  as a representative example.  
260 This value of  $\lambda$  represents our expectation that  $m_b$  should be approximately an order of magnitude smaller  
261 than  $\mu_k$ . We used this to infer a point classification and a batch-corrected dataset (figure 4 B). Note that the  
262 data were on a similar scale to the observed data (figure 4 A), the lack of identifiability for parameters in  
263 the likelihood function did not emerge as a problem here. The batch-corrected dataset was better visually  
264 separated into seronegative and seropositive classes than the observed data due to our batch-correction.

265 To confirm the batch-correction was working as intended we use repeated control samples from a particular  
266 patient, “Patient 4”. A sample from Patient 4 was included in many plates as a positive control but discarded  
267 before our analysis because it was chosen for extremely high antibody levels and so is unrepresentative,  
268 even for the seropositive class. We hypothesised that appropriate batch-correction should bring the different  
269 measurements of this sample closer together, which is indeed what we observed after applying the correction  
270 learnt from the samples excluding Patient 4 (figure 5). Before correction, the batches had no overlap; there  
271 was a distance of 0.197 between the batch means. After correction the two batches overlapped with a

## A semi-supervised Bayesian mixture modelling approach for joint batch correction and classification

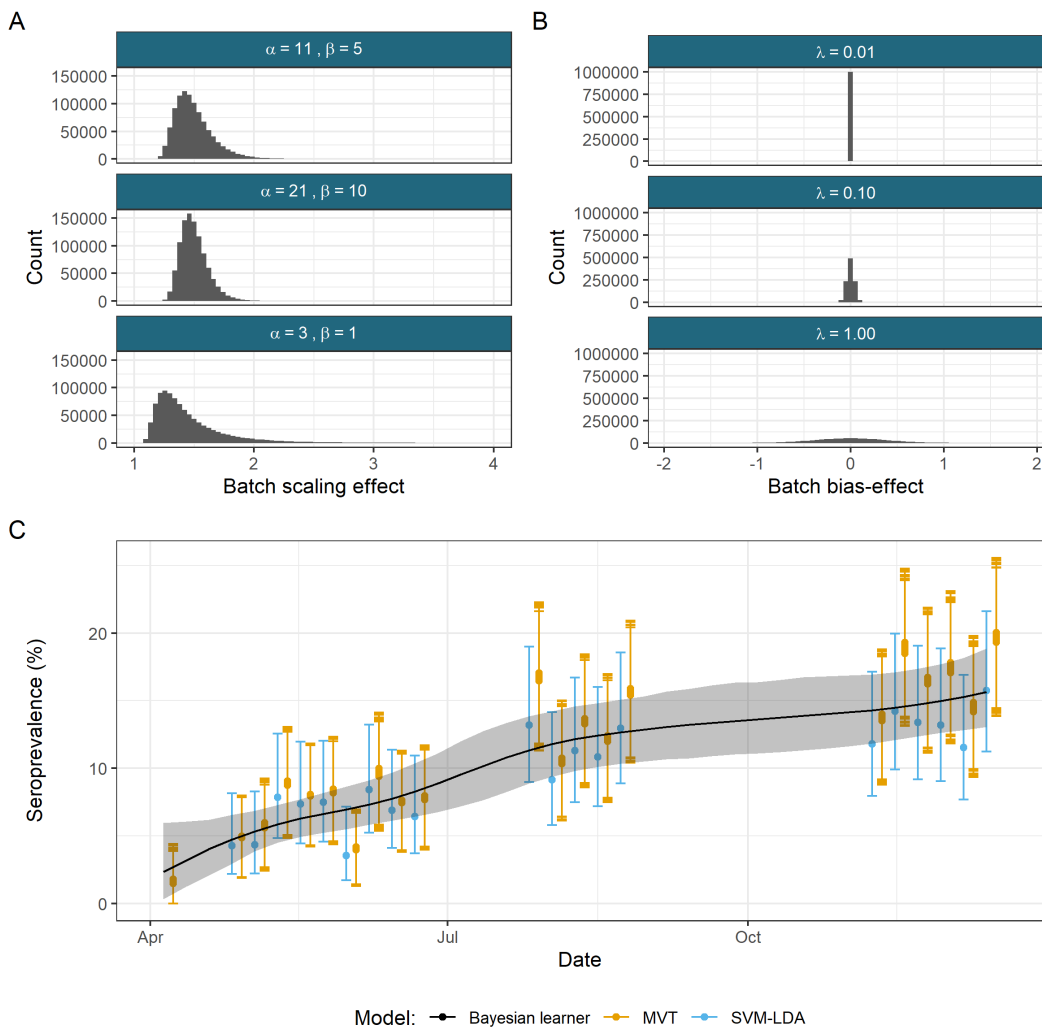

Figure 3: Effect of hyperparameter choices on seroprevalence estimates. One million draws from the prior distributions for the different hyperparameter choices for A) the batch scaling effect and B) the batch shift effect. In A) draws exceeding a value of 4 are hidden. This means that approximately 0.5% of the draws from the prior distribution with a shape of 3 and a scale of 1 are not shown. C) A comparison of the estimated seroprevalence with population 95% confidence intervals for the MVT mixture model with nine different choices of hyperparameters for the batch-effect prior distributions and the estimates from Castro Dopico et al. (7) for the SVM-LDA ensemble model and the Bayesian learner from Christian and Murrell (9). The Bayesian learner is designed to estimate seroprevalence during an epidemic and provides a smooth, non-decreasing estimate across time. Its assumptions ensure a more consistent increase across time, whereas the SVM-LDA and MVT mixture models are not incorporating any explicit temporal information. The estimates from the mixture model have been moved 3 days to the right on the  $x$ -axis to reduce overlap.

## A semi-supervised Bayesian mixture modelling approach for joint batch correction and classification

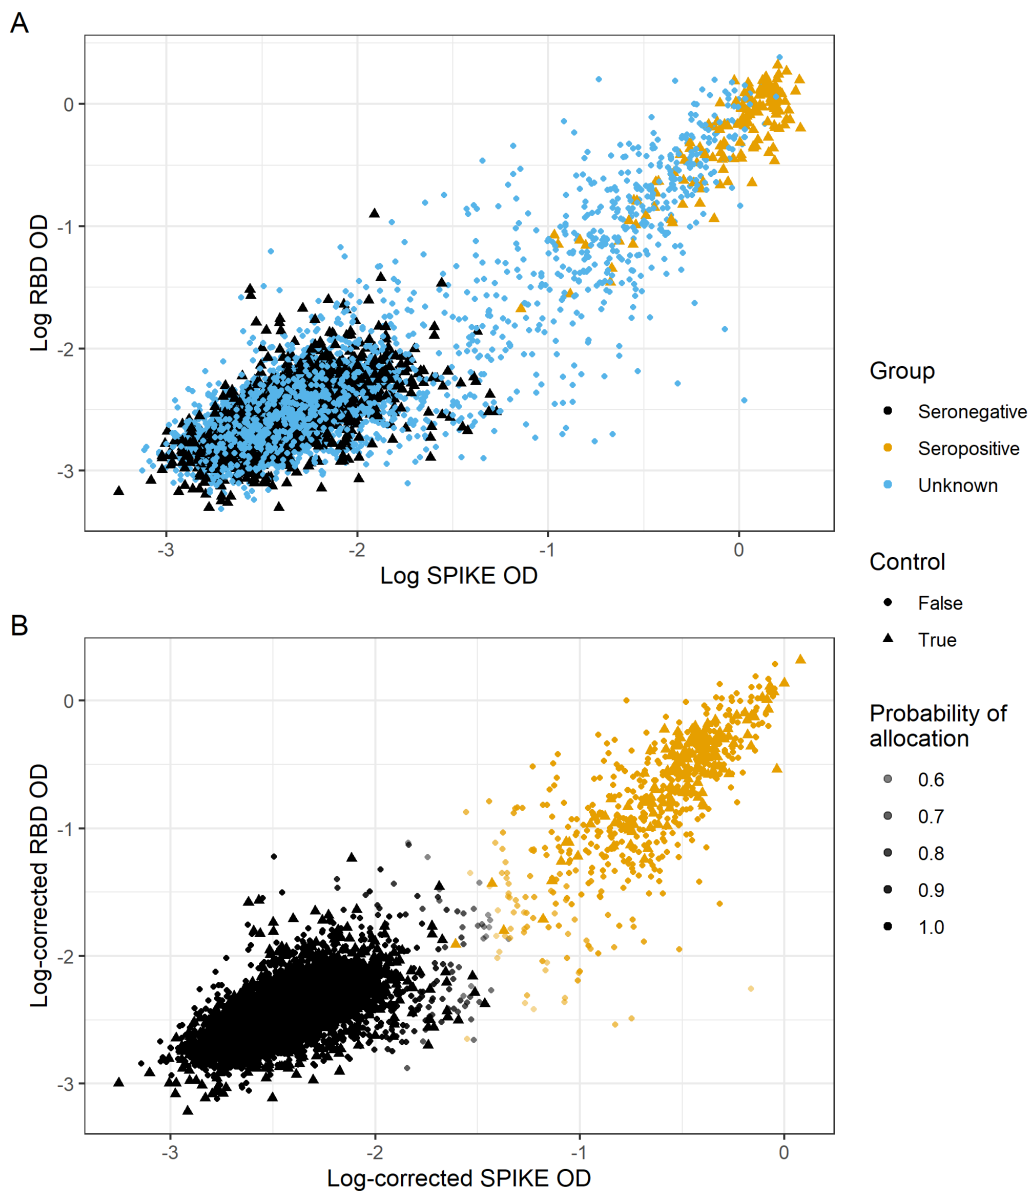

Figure 4: A) The observed data from Castro Dopico et al. (7) and B) the point estimate of the batch-corrected dataset from the MVT mixture model with  $\alpha = 11, \beta = 5, \lambda = 0.1$ . Points on both plots are coloured by the class. In the observed dataset non-control points are labelled “Unknown” and in the batch-corrected dataset these points are labelled with their inferred class.

## A semi-supervised Bayesian mixture modelling approach for joint batch correction and classification

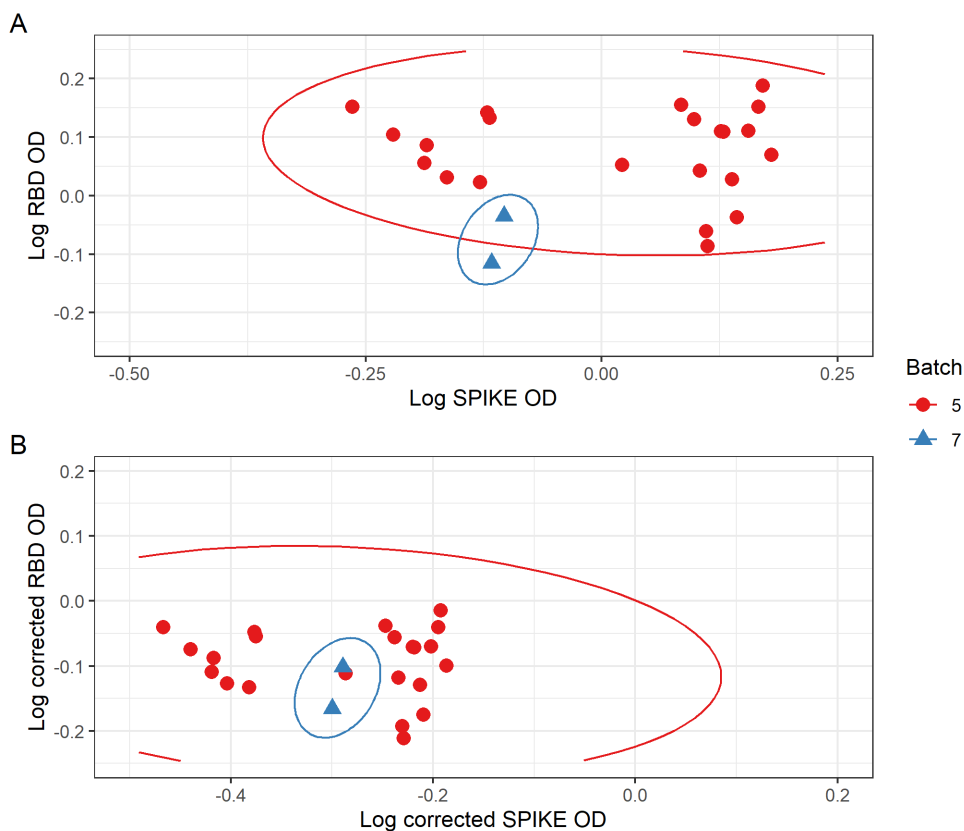

Figure 5: The samples from Patient 4 A) as observed and B) after batch correction, circled by batch.

272 distance of 0.040 between the means as the points moved closer together and towards the class mean (figure  
273 5 would correspond to the upper right hand of figure 4 A and B). The correction also saw the variation  
274 among samples in each batch reduce and become more similar.

### 275 4.2 Pseudo-ELISA data

276 We wished to investigate the possibility that other known positive samples could be more extreme than the  
277 non-hospitalised donors. To examine this, we generated datasets from the model fitted in section 4.1. This  
278 also tests if the model has learnt representative parameters for the dataset, as our generated data should be  
279 very similar to the original data. We used the MCMC sample mean for each parameter except the class  
280 weights. For the class weights we used the inferred proportion of each class in each batch to preserve the  
281 problem of the imbalance of classes across batches. In the original data, the positive controls were more  
282 extreme members of the positive class, having sufficiently severe symptoms to have undergone PCR testing  
283 when such resources were severely constrained early in the pandemic. To reflect this in our data genera-  
284 tion procedure, we increased the probability that samples with observed positive labels (i.e., the positive



## A semi-supervised Bayesian mixture modelling approach for joint batch correction and classification

---

285 controls) are from the tail of the distribution of the seropositive measurements which is furthest from the  
286 seronegative class, whereas the negative controls are sampled uniformly from the seronegative population.  
287 An example dataset is shown in figure 6 C, note how closely it resembles the true ELISA data in figure 4  
288 A, suggesting that the model has learnt accurate values. See section 7 of the supplementary material for a  
289 deeper explanation of the generation process.

290 We performed a similar analysis to our original simulation study on these datasets, comparing our models to  
291 a range of off-the-shelf machine learning methods. Across all of the simulations, we found that our mixture  
292 models outperformed other methods under both the F1 score and the squared distance (figures 6 A, 6 B).

### 293 **4.3 Dingens et al., 2020**

294 As a final real data example, we analysed the ELISA data collected by Dingens et al. (11). This consisted  
295 of 1,891 measurements of antibodies to the SARS-CoV-2 RBD protein. 1,783 of these were from residual  
296 serum from Seattle Children's Hospital, with 52 pre-2020 samples used as negative controls and 52 samples  
297 from individuals with RT-PCR-confirmed infections as positive controls (figure 7 A). These data are different  
298 to the data from Castro Dopico et al. (7) in several ways. There is only a single antigen, there is a smaller  
299 ratio of controls to non-controls, particularly for the seronegative samples, and the controls do not appear  
300 to be representative of either class. The mean log OD of the negative controls is -1.91, whilst the dataset  
301 mean is -2.28 without controls. We analyse the log-transform of the OD using our MVT model for the  
302 same variety range of hyperparameter choices as in table 3. An example of a batch-corrected dataset is  
303 shown in figure 7 B. We show the comparison of the inferred seroprevalence in each batch for an example  
304 chain of each of these models as well as that estimated by Dingens et al. (11) (figure 7 C). The 9 different  
305 hyperparameter choices have almost identical seroprevalence estimates and are estimating higher levels of  
306 seroprevalence than the estimate provided by Dingens et al. (11).

## 307 **5 Discussion**

308 The results of our simulation study show that our mixture model consistently matches or outperforms several  
309 alternatives when applied to data with batch effects, across a range of data generating models. In the more  
310 specific scenario where data were generated from a converged chain that had been applied to the ELISA data  
311 from Castro Dopico et al. (7), we obtained the same findings, with our model again performing better than  
312 the off-the-shelf machine learning methods. We also see from our simulation study that we should use the  
313 MVT density over the MVN density, as the MVT can approximate the MVN quite well by learning a large

## A semi-supervised Bayesian mixture modelling approach for joint batch correction and classification

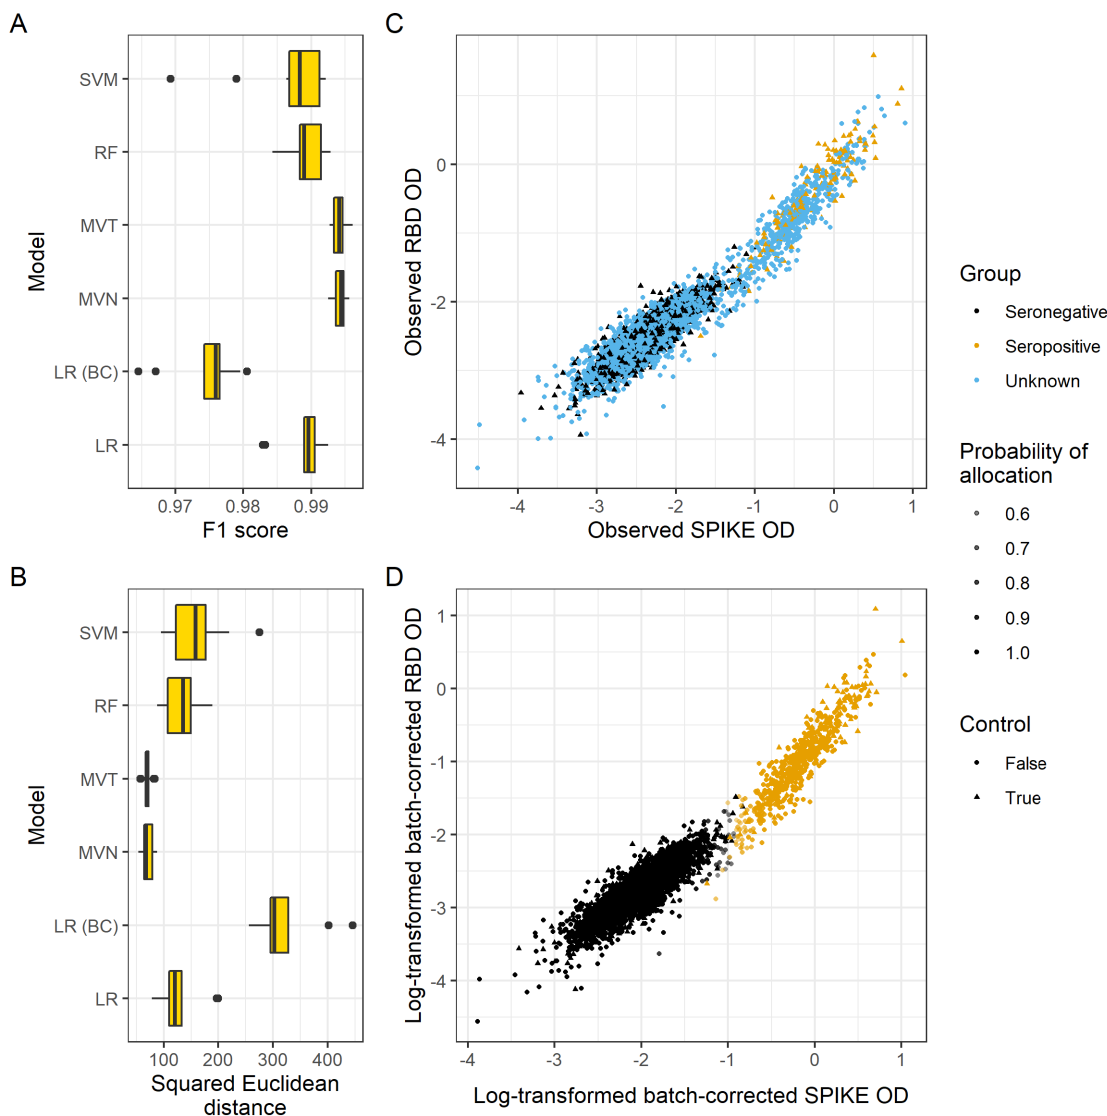

Figure 6: Model comparison for the ELISA-like simulations under the A) F1 score and B) Squared Euclidean distance between the probability allocation matrix and the true classification. B) An example of the simulated data and C) the corresponding inferred dataset for a representative chain of the MVT mixture model.

## A semi-supervised Bayesian mixture modelling approach for joint batch correction and classification

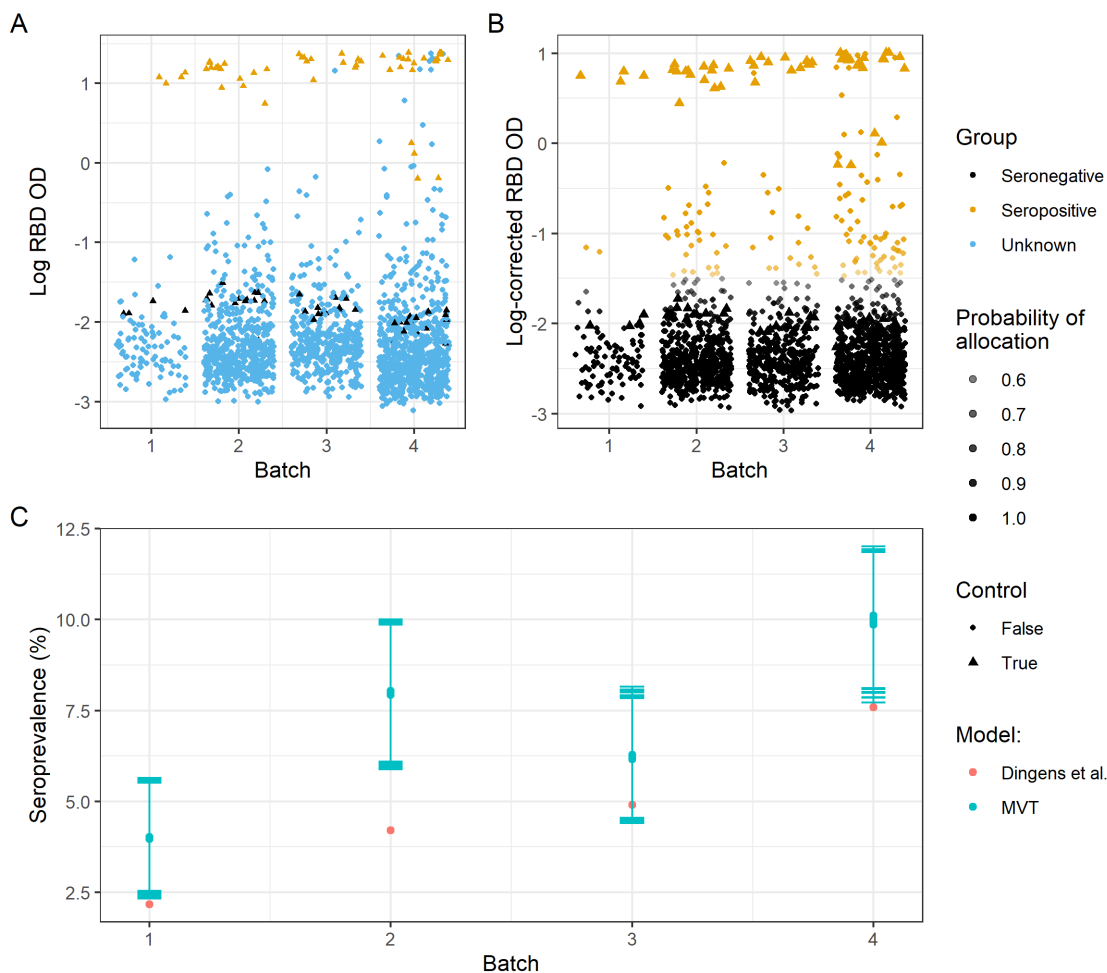

Figure 7: A) The observed data from Dingens et al. (11) and B) the point estimate of the batch-corrected dataset from the MVT mixture model with  $\alpha = 11$ ,  $\beta = 5$ ,  $\lambda = 0.1$ . Points on both plots are coloured by the class. In the observed dataset non-control points are labelled “Unknown” and in the batch-corrected dataset these points are labelled with their inferred class. C) A comparison of the seroprevalence estimate from the MVT mixture model with nine different choices of batch-effect hyperparameters and that from Dingens et al. (11). The error bars indicate the 95% credible interval for the seroprevalence estimates of the MVT mixture model in each batch; this is not available for the estimate from Dingens et al. (11).

## A semi-supervised Bayesian mixture modelling approach for joint batch correction and classification

---

314 degree of freedom, but also has additional flexibility as shown by the Multivariate t generated simulation  
315 scenario where the MVN mixture model behaved very inconsistently. The only cost of the MVT mixture  
316 model is the approximate 50% increase in runtime, but as our implementation is quite fast we believe that  
317 this is not a significant detractor. Based on these results we recommend the use of our MVT mixture model  
318 when the analyst suspects the classes in the data may be non-Gaussian.

319 In terms of estimating seroprevalence, our mixture model performed very well in our simulation study.  
320 Using the results shown in figure 1 C, we can try to gauge how well our method is performing in the ELISA  
321 data. We would argue that the most pertinent scenarios are the MVT generated (the ELISA data are non-  
322 Gaussian), the Varying batch effects and the Varying class representation scenarios. Our method estimates  
323 seroprevalence close to the truth, or slightly smaller, in these simulations. Based on this, we suspect that the  
324 high estimates of seroprevalence provided by our model (relative to those from the original papers) in the  
325 ELISA analyses are plausible.

326 In the Swedish dataset, we are reassured that the batch-correction is reasonable by our analysis of the patient  
327 4 samples - these samples were used across several batches as positive controls; after applying the correction  
328 learnt on the dataset excluding these extreme samples they are no longer separable by batch and have moved  
329 towards the class mean. The data generated from our converged model also appears very similar to the  
330 observed data, suggesting that the model assumptions are reasonable, and that meaningful estimates of the  
331 parameters were obtained.

332 In the analysis using the data from Dingens et al. (11), the unrepresentative negative controls presented a  
333 problem. We believe that the preceding analyses show the potential advantages of our model over existing  
334 methods, but this dataset is a good example to show that our method is not a panacea that may overcome all  
335 problems - it remains vital to have useful and relevant data in order to perform meaningful inference (12).  
336 Any analysis that uses training data that appear to be drawn from a different population than the test data  
337 is unlikely to produce meaningful results. Furthermore, the data are not well-described by a pair of MVT  
338 distributions (even allowing for our additional flexibility with the batch parameters). This combination of  
339 model misspecification and misleading training data makes us skeptical of the inferred parameters.

340 We note, however, that in the simulation of pseudo-ELISA data, our method still performed strongly despite  
341 the positive controls not being representative of the general seropositive sample. In this case our model was  
342 correctly specified (the data are generated from a MVT mixture model). In general, we suspect that our  
343 method is useful if either the assumption that the labelled data represent their class well or that the model  
344 density choice is correct are slightly relaxed, but if both do not hold or if either is profoundly wrong then  
345 the model will perform poorly.

## A semi-supervised Bayesian mixture modelling approach for joint batch correction and classification

---

346 Since only the combined class and batch parameters,  $\mu_k + m_b$  and  $\Sigma_k \oplus S_b$ , are identifiable, one might  
347 expect this to present challenges when fitting our model. While it is possible that the individual batch and  
348 class parameters never stabilise (note that their combinations should converge), running multiple chains  
349 helps to avoid this pitfall as one can use the trace plots for the complete likelihood to assess if the chains  
350 have reached a common mode in the likelihood surface even if the individual batch and class parameters  
351 do not converge. This is standard practice when using stochastic methods, so this aspect of the model  
352 should not introduce additional work to the recommended Bayesian workflow (14). Furthermore, from the  
353 similarity of the inferred parameters across multiple chains in the Base case simulation (figure 2), we have  
354 empirical evidence that this behaviour is not common. We also saw that the seroprevalence estimates and  
355 their credible intervals across different hyperparameter choices in the ELISA analyses were well-behaved  
356 and, as a result, so was the inferred allocation. This similarity across hyperparameter choice suggests that  
357 choosing between specific values is not too important, but we suspect that, if the sample size is smaller,  
358 having  $\lambda$  close to one could exacerbate the identifiability problem for the batch shift effect and the class  
359 mean. Therefore, we suggest setting  $\lambda \leq 0.1$  to encourage these parameters to converge in the small sample  
360 setting (although note that their sum,  $\mu_k + m_b$ , should converge regardless).

361 We have developed a Bayesian method to predict class membership and perform batch-correction simulta-  
362 neously, developing on the pre-processing, univariate method of Johnson et al. (18). Our method is intended  
363 for low-dimensional data, but the main limitation for higher dimensional data is computational (inverting  
364 the covariance matrix becomes very costly) rather than theoretical. Our model is not strictly limited to the  
365 semi-supervised setting either; it could be used for unsupervised learning. In this case we expect that the  
366 model will rely much more heavily on the distributional assumptions. Our work could be extended to include  
367 alternative densities, such as the skew multivariate  $t$ . We could extend the model to include batch-specific  
368 class weights, such as we used to generate the data in our Varying class representation simulation scenario,  
369 or a deeper hierarchy for the batch parameters, such as nested batches (e.g., this could represent scenarios  
370 where multiple plates are run at each of multiple time points or locations).

## 371 Funding

372 This work was funded by the MRC (MC UU 00002/4, MC UU 00002/13) and the Wellcome Trust  
373 (WT2200788) and supported by the NIHR Cambridge Biomedical Research Centre (BRC-1215-20014).  
374 The views expressed are those of the author(s) and not necessarily those of the NHS, the NIHR or the De-  
375 partment of Health and Social Care. This research was funded in whole, or in part, by the Wellcome Trust

## A semi-supervised Bayesian mixture modelling approach for joint batch correction and classification

---

376 [WT107881]. For the purpose of Open Access, the author has applied a CC BY public copyright licence to  
377 any Author Accepted Manuscript version arising from this submission.

### 378 **Acknowledgements**

379 We would like to thank Dingens et al. (11), specifically Janet A. Englund and Jesse D. Bloom, for being  
380 willing to openly share their data and batch information.

### 381 **Authors' contributions**

382 SC, PK and CW all contributed to model design. SC implemented the model in C++ and built the R package  
383 with PK and CW contributing to debugging strategies. SC designed the simulation study and the pseudo-  
384 ELISA data. SC, PK and CW all contributed to the design of the Metropolis algorithm used to implement the  
385 model and the choice of proposal densities. PK, CW and SC all contributed to analysis and the interpretation  
386 of results. XD and GK generated data which CW cleaned. All authors read and approved the manuscript.

### 387 **References**

- 388 [1] Emanuele Aliverti, Kristian Lum, James E. Johndrow, and David B. Dunson. Removing the influence  
389 of group variables in high-dimensional predictive modelling. *Journal of the Royal Statistical Society:  
390 Series A (Statistics in Society)*, 184(3):791–811, 2021. ISSN 1467-985X. doi: 10.1111/rssa.12613.
- 391 [2] O. Alter, P. O. Brown, and D. Botstein. Singular value decomposition for genome-wide expression data  
392 processing and modeling. *Proceedings of the National Academy of Sciences*, 97(18):10101–10106,  
393 August 2000. ISSN 0027-8424, 1091-6490. doi: 10.1073/pnas.97.18.10101.
- 394 [3] Stuart D. Blacksell, Richard G. Jarman, Robert V. Gibbons, Ampai Tanganuchitcharnchai, Mammen P.  
395 Mammen, Ananda Nisalak, Siripen Kalayanarooj, Mark S. Bailey, Ranjan Premaratna, H. Janaka  
396 de Silva, Nicholas P. J. Day, and David G. Lalloo. Comparison of Seven Commercial Antigen and  
397 Antibody Enzyme-Linked Immunosorbent Assays for Detection of Acute Dengue Infection. *Clinical  
398 and Vaccine Immunology*, 19(5):804–810, May 2012. ISSN 1556-6811, 1556-679X. doi: 10.1128/  
399 CVI.05717-11.
- 400 [4] Bernhard E. Boser, Isabelle M. Guyon, and Vladimir N. Vapnik. A training algorithm for optimal  
401 margin classifiers. In *Proceedings of the Fifth Annual Workshop on Computational Learning Theory*,  
402 COLT '92, pages 144–152, New York, NY, USA, July 1992. Association for Computing Machinery.  
403 ISBN 978-0-89791-497-0. doi: 10.1145/130385.130401.

## A semi-supervised Bayesian mixture modelling approach for joint batch correction and classification

---

- 404 [5] Leo Breiman. Random Forests. *Machine Learning*, 45(1):5–32, October 2001. ISSN 1573-0565. doi:  
405 10.1023/A:1010933404324.
- 406 [6] Andrew Butler, Paul Hoffman, Peter Smibert, Efthymia Papalex, and Rahul Satija. Integrating single-  
407 cell transcriptomic data across different conditions, technologies, and species. *Nature Biotechnology*,  
408 36(5):411–420, May 2018. ISSN 1546-1696. doi: 10.1038/nbt.4096.
- 409 [7] X. Castro Dopico, S. Muschiol, M. Christian, L. Hanke, D. J. Sheward, N. F. Grinberg, J. Rorbach,  
410 G. Bogdanovic, G. M. Mcinerney, T. Allander, C. Wallace, B. Murrell, J. Albert, and G. B. Karlsson  
411 Hedestam. Seropositivity in blood donors and pregnant women during the first year of SARS-CoV-2  
412 transmission in Stockholm, Sweden. *Journal of Internal Medicine*, May 2021. ISSN 1365-2796. doi:  
413 10.1111/joim.13304.
- 414 [8] Xaquín Castro Dopico, Leo Hanke, Daniel J. Sheward, Sandra Muschiol, Soo Aleman, Nas-  
415 tasiya F. Grinberg, Monika Adori, Murray Christian, Laura Perez Vidakovics, Changil Kim, Sharesta  
416 Khoenkhoen, Pradeepa Pushparaj, Ainhua Moliner Morro, Marco Mandolesi, Marcus Ahl, Mattias  
417 Forsell, Jonathan Coquet, Martin Corcoran, Joanna Rorbach, Joakim Dillner, Gordana Bogdanovic,  
418 Gerald M. McInerney, Tobias Allander, Ben Murrell, Chris Wallace, Jan Albert, and Gunilla B. Karls-  
419 son Hedestam. Probabilistic approaches for classifying highly variable anti-sars-cov-2 antibody re-  
420 sponses. *medRxiv*, 2021. doi: 10.1101/2020.07.17.20155937. URL [https://www.medrxiv.org/  
421 content/early/2021/01/06/2020.07.17.20155937](https://www.medrxiv.org/content/early/2021/01/06/2020.07.17.20155937).
- 422 [9] Murray Christian and Ben Murrell. Discriminative Bayesian Serology: Counting Without Cutoffs.  
423 *bioRxiv*, 2020. doi: 10.1101/2020.07.14.202150. URL [https://www.biorxiv.org/content/  
424 early/2020/07/14/2020.07.14.202150](https://www.biorxiv.org/content/early/2020/07/14/2020.07.14.202150).
- 425 [10] Oliver M. Crook, Claire M. Mulvey, Paul D. W. Kirk, Kathryn S. Lilley, and Laurent Gatto. A Bayesian  
426 mixture modelling approach for spatial proteomics. *PLOS Computational Biology*, 14(11):e1006516,  
427 November 2018. ISSN 1553-7358. doi: 10.1371/journal.pcbi.1006516.
- 428 [11] Adam S. Dingens, Katharine H. D. Crawford, Amanda Adler, Sarah L. Steele, Kirsten Lacombe,  
429 Rachel Eguia, Fatima Amanat, Alexandra C. Walls, Caitlin R. Wolf, Michael Murphy, Deleah Pettie,  
430 Lauren Carter, Xuan Qin, Neil P. King, David Veesler, Florian Krammer, Jane A. Dickerson, Helen Y.  
431 Chu, Janet A. Englund, and Jesse D. Bloom. Serological identification of SARS-CoV-2 infections  
432 among children visiting a hospital during the initial Seattle outbreak. *Nature Communications*, 11(1):  
433 4378, September 2020. ISSN 2041-1723. doi: 10.1038/s41467-020-18178-1.
- 434 [12] David B. Dunson. Statistics in the Big Data era: Failures of the machine. *Statistics & Probability  
435 Letters*, 136:4–9, 2018.



## A semi-supervised Bayesian mixture modelling approach for joint batch correction and classification

---

- 436 [13] Chris Fraley and Adrian E Raftery. Bayesian Regularization for Normal Mixture Estimation and  
437 Model-Based Clustering. *Journal of classification*, page 27, 2007.
- 438 [14] Andrew Gelman, Aki Vehtari, Daniel Simpson, Charles C. Margossian, Bob Carpenter, Yuling Yao,  
439 Lauren Kennedy, Jonah Gabry, Paul-Christian Bürkner, and Martin Modrák. Bayesian Workflow.  
440 *arXiv:2011.01808 [stat]*, November 2020.
- 441 [15] John Geweke et al. *Evaluating the Accuracy of Sampling-Based Approaches to the Calculation of*  
442 *Posterior Moments*, volume 196. Federal Reserve Bank of Minneapolis, Research Department Min-  
443 neapolis, MN, 1991.
- 444 [16] Dane Granger, Heather Hilgart, Lori Misner, Jaime Christensen, Sarah Bistodeau, Jennifer Palm,  
445 Anna K. Strain, Marja Konstantinovski, Dakai Liu, and Anthony Tran. Serologic testing for Zika  
446 virus: Comparison of three Zika virus IgM-screening enzyme-linked immunosorbent assays and ini-  
447 tial laboratory experiences. *Journal of clinical microbiology*, 55(7):2127–2136, 2017.
- 448 [17] Laleh Haghverdi, Aaron T. L. Lun, Michael D. Morgan, and John C. Marioni. Batch effects in single-  
449 cell RNA sequencing data are corrected by matching mutual nearest neighbours. *Nature biotechnology*,  
450 36(5):421–427, June 2018. ISSN 1087-0156. doi: 10.1038/nbt.4091.
- 451 [18] W. Evan Johnson, Cheng Li, and Ariel Rabinovic. Adjusting batch effects in microarray expression  
452 data using empirical Bayes methods. *Biostatistics*, 8(1):118–127, January 2007. ISSN 1468-4357,  
453 1465-4644. doi: 10.1093/biostatistics/kxj037.
- 454 [19] Miguel A. Juárez and Mark F. J. Steel. Model-Based Clustering of Non-Gaussian Panel Data Based on  
455 Skew-  $t$  Distributions. *Journal of Business & Economic Statistics*, 28(1):52–66, January 2010. ISSN  
456 0735-0015, 1537-2707. doi: 10.1198/jbes.2009.07145.
- 457 [20] Alexandros Karatzoglou, Alex Smola, Kurt Hornik, and Achim Zeileis. kernlab – an S4 package  
458 for kernel methods in R. *Journal of Statistical Software*, 11(9):1–20, 2004. URL <http://www.jstatsoft.org/v11/i09/>.
- 460 [21] Sharon X. Lee, Geoffrey J. McLachlan, and Saumyadipta Pyne. Modeling of inter-sample variation  
461 in flow cytometric data with the joint clustering and matching procedure: Modeling of Inter-Sample  
462 Variation. *Cytometry Part A*, 89(1):30–43, January 2016. ISSN 15524922. doi: 10.1002/cyto.a.22789.
- 463 [22] Jeffrey T. Leek, Robert B. Scharpf, Héctor Corrada Bravo, David Simcha, Benjamin Langmead,  
464 W. Evan Johnson, Donald Geman, Keith Baggerly, and Rafael A. Irizarry. Tackling the widespread and  
465 critical impact of batch effects in high-throughput data. *Nature Reviews. Genetics*, 11(10):733–739,  
466 October 2010. ISSN 1471-0064. doi: 10.1038/nrg2825.



## A semi-supervised Bayesian mixture modelling approach for joint batch correction and classification

---

- 467 [23] Tenglong Li, Yuqing Zhang, Prasad Patil, and W. Evan Johnson. Overcoming the impacts of two-step  
468 batch effect correction on gene expression estimation and inference. *bioRxiv*, page 2021.01.24.428009,  
469 January 2021. doi: 10.1101/2021.01.24.428009.
- 470 [24] Andy Liaw and Matthew Wiener. Classification and regression by randomforest. *R News*, 2(3):18–22,  
471 2002. URL <https://CRAN.R-project.org/doc/Rnews/>.
- 472 [25] J Luo, M Schumacher, A Scherer, D Sanoudou, D Megherbi, T Davison, T Shi, W Tong, L Shi,  
473 H Hong, C Zhao, F Elloumi, W Shi, R Thomas, S Lin, G Tillinghast, G Liu, Y Zhou, D Herman,  
474 Y Li, Y Deng, H Fang, P Bushel, M Woods, and J Zhang. A comparison of batch effect removal  
475 methods for enhancement of prediction performance using MAQC-II microarray gene expression data.  
476 *The Pharmacogenomics Journal*, 10(4):278–291, August 2010. ISSN 1470-269X, 1473-1150. doi:  
477 10.1038/tpj.2010.57.
- 478 [26] Reuben McGregor, Alana L. Whitcombe, Campbell R. Sheen, James M. Dickson, Catherine L.  
479 Day, Lauren H. Carlton, Prachi Sharma, J. Shaun Lott, Barbara Koch, Julie Bennett, Michael G.  
480 Baker, Stephen R. Ritchie, Shivani Fox-Lewis, Susan C. Morpeth, Susan L. Taylor, Sally A. Roberts,  
481 Rachel H. Webb, and Nicole J. Moreland. Collaborative networks enable the rapid establishment of  
482 serological assays for SARS-CoV-2 during nationwide lockdown in New Zealand. *PeerJ*, 8:e9863,  
483 September 2020. ISSN 2167-8359. doi: 10.7717/peerj.9863.
- 484 [27] Caroline E. Mullis, Oliver Laeyendecker, Steven J. Reynolds, Ponsiano Ocama, Jeffrey Quinn, Iga  
485 Boaz, Ronald H. Gray, Gregory D. Kirk, David L. Thomas, and Thomas C. Quinn. High frequency  
486 of false-positive hepatitis C virus enzyme-linked immunosorbent assay in Rakai, Uganda. *Clinical*  
487 *infectious diseases*, 57(12):1747–1750, 2013.
- 488 [28] S. K. Ng, G. J. McLachlan, K. Wang, L. Ben-Tovim Jones, and S.-W. Ng. A Mixture model with  
489 random-effects components for clustering correlated gene-expression profiles. *Bioinformatics*, 22(14):  
490 1745–1752, July 2006. ISSN 1367-4803, 1460-2059. doi: 10.1093/bioinformatics/btl165.
- 491 [29] Vegard Nygaard, Einar Andreas Rødland, and Eivind Hovig. Methods that remove batch effects while  
492 retaining group differences may lead to exaggerated confidence in downstream analyses. *Biostatistics*  
493 *(Oxford, England)*, 17(1):29–39, January 2016. ISSN 1465-4644. doi: 10.1093/biostatistics/kxv027.
- 494 [30] Sandhya Prabhakaran, Elham Azizi, Ambrose Carr, and Dana Pe’er. Dirichlet Process Mixture Model  
495 for Correcting Technical Variation in Single-Cell Gene Expression Data. *International Conference on*  
496 *Machine Learning*, page 10, June 2016.

## A semi-supervised Bayesian mixture modelling approach for joint batch correction and classification

---

- 497 [31] R Core Team. *R: A Language and Environment for Statistical Computing*. R Foundation for Statistical  
498 Computing, Vienna, Austria, 2021. URL <https://www.R-project.org/>.
- 499 [32] Ronald P. Schuyler, Conner Jackson, Josselyn E. Garcia-Perez, Ryan M. Baxter, Sidney Ogolla, Rose-  
500 mary Rochford, Debashis Ghosh, Pratyaydipta Rudra, and Elena W. Y. Hsieh. Minimizing Batch  
501 Effects in Mass Cytometry Data. *Frontiers in Immunology*, 10:2367, October 2019. ISSN 1664-3224.  
502 doi: 10.3389/fimmu.2019.02367.
- 503 [33] Daniel Stadlbauer, Fatima Amanat, Veronika Chromikova, Kaijun Jiang, Shirin Strohmeier,  
504 Guha Asthagiri Arunkumar, Jessica Tan, Disha Bhavsar, Christina Capuano, Ericka Kirkpatrick, Philip  
505 Meade, Ruhi Nichalle Brito, Catherine Teo, Meagan McMahon, Viviana Simon, and Florian Kram-  
506 mer. SARS-CoV-2 Seroconversion in Humans: A Detailed Protocol for a Serological Assay, Antigen  
507 Production, and Test Setup. *Current Protocols in Microbiology*, 57(1):e100, 2020. ISSN 1934-8533.  
508 doi: 10.1002/cpmc.100.
- 509 [34] A. Voller, D. Bidwell, G. Huldts, and E. Engvall. A microplate method of enzyme-linked immunosor-  
510 bent assay and its application to malaria. *Bulletin of the World Health Organization*, 51(2):209, 1974.
- 511 [35] Brian W. Whitcomb, Neil J. Perkins, Paul S. Albert, and Enrique F. Schisterman. Treatment of Batch in  
512 the Detection, Calibration, and Quantification of Immunoassays in Large-scale Epidemiologic Studies.  
513 *Epidemiology (Cambridge, Mass.)*, 21(Suppl 4):S44–S50, July 2010. ISSN 1044-3983. doi: 10.1097/  
514 EDE.0b013e3181dceac2.

# A semi-supervised Bayesian mixture modelling approach for joint batch correction and classification: Supplementary material

Stephen Coleman<sup>1,\*</sup>  
stephen.coleman@mrc-bsu.cam.ac.uk  
Xaquín Castro Dopico<sup>2</sup>  
xaquin.castro.dopico@ki.se  
Gunilla B. Karlsson Hedestam<sup>2</sup>  
gunilla.karlsson.hedestam@ki.se  
Paul D.W. Kirk<sup>1,3,†</sup>  
paul.kirk@mrc-bsu.cam.ac.uk  
Chris Wallace<sup>1,3,†</sup>  
cew54@cam.ac.uk

<sup>1</sup> MRC Biostatistics Unit

<sup>3</sup> Cambridge Institute of Therapeutic Immunology & Infectious Disease  
University of Cambridge, U.K.

<sup>2</sup> Department of Microbiology, Tumor and Cell Biology  
Karolinska Institutet, Sweden.

\* Corresponding author.

† These authors provided an equal contribution.

## Abstract

Description of the model, our choice of priors, and the sampling algorithm. Example of likelihood trace plots for model convergence. Description of how the simulated data is generated for both the main simulation study and the pseudo-ELISA simulation.

## 1 Model

Our data  $X = (X_1, \dots, X_N)$  is generated across  $B$  batches where the origin batch of each point is known and represented by the vector  $b = (b_1, \dots, b_N)$ . We are interested in classifying  $X$  into  $K$  disjoint classes. We model  $X$  using a  $K$  component mixture model:

$$p(X|b_n = b, \theta, \psi) = \sum_{k=1}^K \pi_k f(X_n|\theta_k, z_b). \quad (1)$$

Here  $f(\cdot)$  is the density function,  $\pi = (\pi_1, \dots, \pi_K)$  are the component or class weights,  $\theta = (\theta_1, \dots, \theta_K)$  are the parameters describing the classes and  $z = (z_1, \dots, z_B)$  are the parameters associated with the batches. We introduce an allocation variable,  $c = (c_1, \dots, c_N)$ , to represent the class membership and assume that each class is represented by a single component of the mixture. Conditioning on  $c$ , our model is then

$$p(X_n|b_n = b, c_n = k, \theta, \psi) = f(X_n|\theta_k, z_b). \quad (2)$$

For us,  $c$  contains some observed values (alternatively,  $c$  contains missing values), this enables supervised or semi-supervised methods to infer the missing values. We introduce a binary vector,  $\phi = (\phi_1, \dots, \phi_N)$ , indicating if the label of the  $n^{\text{th}}$  individual is observed or not. If we separate our dataset into subsets

$$X_{\text{train}} = \{X_n \in X : \phi_n = 1\}, \quad (3)$$

$$X_{\text{test}} = \{X_n \in X : \phi_n = 0\}. \quad (4)$$

and use  $X_{\text{train}}$  to train some classifier which predicts the labels of  $X_{\text{test}}$ , we would be in traditional prediction territory. However, the Bayesian framework enables us to integrate these steps, seamlessly incorporating information from the allocations from  $X_{\text{test}}$  into the class parameters while maintaining the information from  $X_{\text{train}}$ .

## 1.1 Multivariate Normal

Let  $f$  be the density function for the multivariate normal distribution, parametrised by a mean vector  $\mu$  and a covariance matrix  $\Sigma$ .

We assume

$$\begin{aligned} X_n | c_n, b_n, \dots &\sim \mathcal{N}(\mu_{c_n} + m_{b_n}, \Sigma_{c_n} \oplus S_{b_n}), \\ \implies p(X_n | \cdot) &= [(2\pi)^P |\Sigma_{c_n} \oplus S_{b_n}|]^{-1/2} \\ &\quad \times \exp \left\{ -\frac{1}{2} [X_n - (\mu_{c_n} + m_{b_n})]^T (\Sigma_{c_n} \oplus S_{b_n})^{-1} [X_n - (\mu_{c_n} + m_{b_n})] \right\}. \end{aligned}$$

We also assume that the batch effects have no correlation across dimensions. We restrict the covariance matrix,  $S_b$ , to being diagonal and assume independence between the entries of  $m_b$ .

Our hierarchical model is

$$\mu_k, \Sigma_k | \xi, \kappa, \nu, \Psi \sim \mathcal{N} \left( \mu_k | \xi, \frac{\Sigma_k}{\kappa} \right) \mathcal{IW}(\Sigma_k | \nu, \Psi), \quad (5)$$

$$m_{b,p} | \lambda, \delta^2 \sim \mathcal{N}(0, \lambda \delta^2), \quad (6)$$

$$(S_b)_{p,p} | \alpha, \beta, S_{loc} \sim \mathcal{IG}(\alpha, \beta, S_{loc}), \quad (7)$$

$$\pi | \gamma \sim \text{Dir}(\gamma/K, \dots, \gamma/K), \quad (8)$$

$$c_n | \pi \sim \text{Cat}(\pi), \quad (9)$$

$$X_n | c_n = k, b_n = b, \mu_k, \Sigma_k, m_b, S_b \sim \mathcal{N}(\mu_k + m_b, \Sigma_k \oplus S_b). \quad (10)$$

$\mathcal{IW}$  denotes the inverse-Wishart distribution,  $\mathcal{IG}$  denotes the inverse-Gamma distribution with a shape  $\alpha$ , rate  $\beta$  and location  $S_{loc}$ .  $\mathcal{N}$  is the Gaussian distribution,  $\text{Dir}$  is the Dirichlet distribution and  $\text{Cat}$  is the categorical distribution. As we assume independence of batch effects across dimensions, we model each entry of the  $b^{\text{th}}$  batch mean vector,  $m_{b,p}$ , and the  $b^{\text{th}}$  batch covariance matrix,  $(S_b)_{p,p}$ , using one dimensional distributions.

The total joint probability is

$$\begin{aligned} p(X, \mu, \Sigma, m, S, \pi, c | b) &= p(\pi | \gamma) p(X, c | \mu_k, \Sigma_k, m_b, S_b, b) \\ &\quad \times \prod_{k=1}^K p(\mu_k | \xi, \Sigma_k, \kappa) p(\Sigma_k | \nu, \Psi) \\ &\quad \times \prod_{b=1}^B \prod_{p=1}^P p(m_{b,p} | \lambda, \delta^2) p((S_b)_{p,p} | \alpha, \beta, S_{loc}) \\ &= f_{\text{Dir}}(\gamma) \prod_{n=1}^N \sum_{k=1}^K \pi_k f_{\mathcal{N}}(X_n | \mu_k + m_b, \Sigma_k \oplus S_b) \\ &\quad \times \prod_{k=1}^K f_{\mathcal{N}}(\mu_k | \xi, \Sigma_k, \kappa) f_{\mathcal{IW}}(\Sigma_k | \nu, \Psi) \\ &\quad \times \prod_{b=1}^B \prod_{p=1}^P f_{\mathcal{N}}(m_{b,p} | 0, \lambda \delta^2) f_{\mathcal{IG}}((S_b)_{p,p} | \alpha, \beta, S_{loc}). \end{aligned}$$

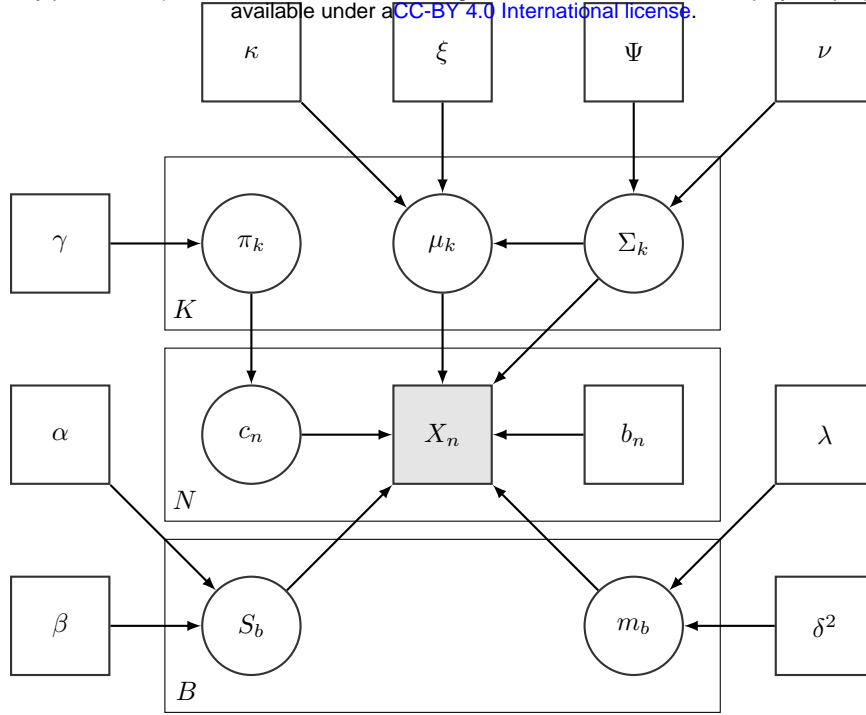

Figure 1: Directed acyclic graph for mixture of multivariate normal distributions with random effects.

## 1.2 Multivariate $t$

If we let  $f$  be the density function for the multivariate  $t$  (**MVT**) distribution, parametrised by a mean vector  $\mu$ , a covariance matrix  $\Sigma$  and degrees of freedom,  $\eta$ , then the model remains as described in section 1.1 and equations 5, except the model likelihood changes and we introduce a prior distribution over  $\eta$ :

$$\eta_k \sim \mathcal{G}(\epsilon, \zeta), \quad (11)$$

$$X_n | c_n = k, b_n = b, \mu_k, \Sigma_k, \eta_k, m_b, S_b \sim t_{\eta_k}(\mu_k + m_b, \Sigma_k \oplus S_b). \quad (12)$$

here  $\mathcal{G}$  denotes the Gamma distribution parametrised by a shape and rate.

The total joint probability for the mixture of MVT distributions is

$$\begin{aligned} p(X, \mu, \Sigma, \eta, m, S, \pi, c|b) &= p(\pi|\gamma)p(X, c|\mu_k, \Sigma_k, m_b, S_b, b, \eta_k) \\ &\times \prod_{k=1}^K p(\mu_k|\xi, \Sigma_k, \kappa)p(\Sigma_k|\nu, \Psi)p(\eta_k|\epsilon, \zeta) \\ &\times \prod_{b=1}^B \prod_{p=1}^P p(m_{b,p}|\lambda\delta^2)p((S_b)_{p,p}|\alpha, \beta, S_{loc}) \\ &= f_{Dir}(\gamma) \prod_{n=1}^N \sum_{k=1}^K \pi_k f_t(X_n|\mu_k + m_b, \Sigma_k \oplus S_b, \eta_k) \\ &\times \prod_{k=1}^K f_{\mathcal{N}}(\mu_k|\xi, \Sigma_k, \kappa)f_{\mathcal{IW}}(\Sigma_k|\nu, \Psi)f_{\mathcal{G}}(\eta_k|\epsilon, \zeta) \\ &\times \prod_{b=1}^B \prod_{p=1}^P f_{\mathcal{N}}(m_{b,p}|0, \delta^2)f_{\mathcal{IG}}((S_b)_{p,p}|\alpha, \beta, S_{loc}). \end{aligned}$$

## 1.3 Parameter interpretation

Note that the ‘‘batch’’ parameters should not be inferred as direct estimates of the effect the batches have on the true measures. As we are essentially performing a classification on the inferred batch-free

dataset,

$$(Y_{n,p}|c_n = k, b_n = b, \dots) = \frac{X_{n,p} - m_{b,p} - \mu_{k,p}}{(S_b)_{p,p}} + \mu_{k,p}, \quad (13)$$

$$p(Y_n|\mu, \Sigma, \pi_k) = \sum_{k=1}^K \pi_k p(Y_n|\mu_k, \Sigma_k), \quad (14)$$

and the likelihood parameters of  $\mu_k + m_b$  and  $\Sigma_k \oplus S_b$  are not constrained in the likelihood, we recommend that users focus on the relative change in the measurements for batches, the inferred dataset and the inferred classification rather than the direct meaning of individual parameters.

## 2 Empirical Bayes

We use the suggestions of Fraley and Raftery (2007) for our choices of prior hyperparameters on the class parameters.

$$\xi = \frac{1}{N} \sum_{n=1}^N X_n, \quad (15)$$

$$\kappa = 0.01, \quad (16)$$

$$\nu = P + 2. \quad (17)$$

The choice of  $\xi$  is self-explanatory.  $\kappa$  can be viewed as the number of observations contributing to the prior. Fraley and Raftery (2007) choose a value based on experiments to acquire a BIC curve that is a smooth extension of the counterpart without a prior. The marginal prior distribution of  $\mu_k$  is a Student's  $t$  distribution centred at  $\xi$  with  $\nu - P + 1$  degrees of freedom.  $\nu$  is the smallest integer value for the degrees of freedom that gives a finite variance.

We set  $\Psi$  as a diagonal matrix. Let

$$\Sigma_0 = \frac{1}{N-1} \sum_{n=1}^N (X_n - \xi)(X_n - \xi)^T, \quad (18)$$

$$\bar{\sigma}_0^2 = \frac{1}{P} \sum_{p=1}^P (\Sigma_0)_{p,p}, \quad (19)$$

then

$$\Psi_{p,p} = \frac{\bar{\sigma}_0^2}{K^{2/P}}. \quad (20)$$

The logic is that the mixture components are expected, *a priori*, to each fill a common fraction of the total volume of space the data occupies.

For the concentration on the class weights, we use a flat prior with  $\gamma = 1$ . In our motivating example of ELISA data, we cannot use more information (such as the ratio of class members in the known data), as the negative controls are historical samples the number of which is chosen before the experiment and is not related to the expected seroprevalence in the dataset.

For the degrees of freedom for the MVT,  $\eta_k$ , we use an uninformative prior that offers a range of plausible values,  $\epsilon = 2.0, \zeta = 0.1$  (Juárez and Steel, 2010).

## 3 Sampling algorithm

We use a *Metropolis-within-Gibbs* algorithm to sample our parameters. All parameters where the form of their posterior distribution is known are sampled via Gibbs sampling (Geman and Geman, 1984), the remaining parameters are sampled in a Metropolis-Hastings step (Metropolis et al., 1953; Hastings, 1970).

---

**Algorithm 1:** *sampler*( $X, I, c_0, fixed, b, K$ )

---

**Input:**  
Data  $X$ ,  
The number of iterations,  $I$ ,  
Initial classification,  $c_0$ ,  
Fixed labels, *fixed*,  
Batch membership,  $b$ ,  
The number of classes to model,  $K$ ,  
The prior distributions for each parameter,  
The likelihood function,  $p(X|\cdot)$ ,  
The proposal distributions for each class and batch parameter,  $q(\theta)$ .

**Output:** A Markov chain of accepted values for each of the sampled parameters.

**begin**

```

/* initialise parameters by drawing from the prior */
sampleFromPriors();
for i = 1 to I do
    /* Update the class weights in a Gibbs step */
     $\pi \leftarrow \text{updateWeights}(c, \gamma)$ ;
    /* Update the class and batch parameters in a Metropolis-Hastings step */
    for k = 1 to K do
         $\Sigma_k^i \leftarrow \text{metropolisHastings}(\Sigma_k^{i-1}, \nu_\Sigma, q_\Sigma(\cdot))$ ;
         $\mu_k^i \leftarrow \text{metropolisHastings}(\mu_k^{i-1}, \sigma_\mu^2 \mathbf{I}, q_\mu(\cdot))$ ;
    for b = 1 to B do
        for p = 1 to P do
             $(S_b^i)_{p,p} \leftarrow \text{metropolisHastings}(((S_b^{i-1})_{p,p}, \beta_S, q_S(\cdot))$ ;
             $m_b^i \leftarrow \text{metropolisHastings}(m_b^{i-1}, \sigma_m^2 \mathbf{I}, q_m(\cdot))$ ;
        /* Update the class allocations */
         $c \leftarrow \text{updateAllocations}(X, b, \pi, fixed)$ ;
        /* Update the batch corrected data based on the current parameters. */
         $Y \leftarrow \text{batchCorrected}(X, c, b, \mu, m, S)$ ;

```

---



---

**Algorithm 2:** *sampleFromPriors*()

---

**Output:** Initial values for class and batch parameters.

**begin**

```

for k = 1 to K do
     $\Sigma_k \sim \mathcal{IW}(\nu, \Psi)$ ;
     $\mu_k \sim \mathcal{N}(\xi, \Sigma_k / \kappa)$ ;
for b = 1 to B do
    for p = 1 to P do
         $(S_b)_{p,p} \sim \mathcal{IG}(\alpha, \beta, S_{loc})$ ;
         $m_{b,p} \sim \mathcal{N}(0, \delta^2)$ ;

```

---

---

**Algorithm 3:** *updateAllocation*( $X, b, \pi, fixed$ )

---

**Input:**  
 $X$ , the observed data,  
 $b$ , the batch variable,  
 $\pi$ , the class weights,  
 $fixed$ , the binary vector indicating if the label is known.  
**Output:**  $c$ , a new allocation vector.  
**begin**  
    **for**  $n = 1$  **to**  $N$  **do**  
        /\* If the item's class is unknown, update. \*/  
        **if**  $fixed_n == 0$  **then**  
             $ll \leftarrow \logLikelihood(X_n, b_n)$ ;  
             $ll \leftarrow ll + \log \pi$ ;  
            /\* Handle overflow and normalise. \*/  
             $ll \leftarrow \exp(ll - \max(ll))$ ;  
             $ll \leftarrow ll / \text{sum}(ll)$ ;  
            /\* update class. \*/  
             $u \sim \mathcal{U}(0, 1)$ ;  
             $c_n \leftarrow \text{sum}(u > \text{cumsum}(ll))$ ;

---



---

**Algorithm 4:** *updateWeights*( $c, \gamma$ )

---

**Input:**  
 $c$ , the current allocation,  
 $\gamma$ , the prior concentration vector for the class weights.  
**Output:**  $\pi$ , a new class weight vector.  
**begin**  
    **for**  $k = 1$  **to**  $K$  **do**  
         $members_k \leftarrow \text{which}(c == k)$ ;  
         $N_k \leftarrow \text{count}(members_k)$ ;  
        /\* the concentration for  $p_{i_k}$  is the sum of the count of class members and  
        the prior concentration. \*/  
         $\gamma \leftarrow \gamma_k + N_k$ ;  
         $\pi_k \sim \mathcal{G}(\gamma, 1.0)$ ;  
    /\* convert the weights from a Gamma random variable to a Dirichlet (or, if  
     $K = 2$ , a Beta) random variable. \*/  
     $\pi \leftarrow \pi / \text{sum}(\pi)$ ;

---



---

**Algorithm 5:** *batchCorrected*( $X, c, b, \mu, m, S$ )

---

**Input:**

$X$ , the observed dataset,  
 $c$ , the allocation vector,  
 $b$ , the batch label vector,  
 $\mu$ , the class means,  
 $m$ , the batch effect on the class means,  
 $S$ , the batch effect on the class standard deviations.

**Output:**  $Y$ , the batch-corrected dataset.

**begin**

```

/* Iterative over points performing batch correction.          */
for  $n = 1$  to  $N$  do
  /* Extract the current point's class and batch.            */
   $k \leftarrow c_n$ ;
   $b \leftarrow b_n$ ;
  /* Remove the inferred batch effect.                       */
  for  $n = 1$  to  $N$  do
     $Y_{n,p} \leftarrow (X_{n,p} - \mu_{k,p} - m_{b,p}) / (S_b)_{p,p} + \mu_{k,p}$ ;

```

---



---

**Algorithm 6:** *metropolisHastings*( $\theta, \sigma_{win}^2, q(\cdot)$ )

---

**Input:**

Current parameter value  $\theta$ ,  
Proposal window,  $\sigma_{win}^2$ ,  
The proposal distribution,  $q(\theta, \sigma_{win}^2)$ ,  
The prior distribution for  $\theta$ ,  $p(\theta)$ ,  
The likelihood of  $\theta$ ,  $p(X|\theta)$ .

**Output:** A value  $\theta^*$ .

**begin**

```

/* sample a proposal for  $\theta$                                 */
 $\theta' \sim q(\theta, \sigma_{win}^2)$ ;
/* calculate the acceptance probability (note that if  $q(\cdot)$  is a symmetric
distribution it cancels out)                                */
 $\alpha \leftarrow \min\left(1, \frac{p(X|\theta')p(\theta)q(\theta|\theta')}{p(X|\theta)p(\theta')q(\theta|\theta)}\right)$ ;
 $u \sim Unif(0, 1)$ ;
if  $u < \alpha$  then
  |  $\theta^* \leftarrow \theta'$ ;
else
  |  $\theta^* \leftarrow \theta$ ;

```

---

### 3.1 Proposal distributions

For our batch and class parameters, we choose proposal densities that have an expectation of the current value and have the correct support. The class and batch means have a support  $(\infty, \infty)$ ; this allows use of a Gaussian proposal distribution with a mean of the current value.

$$m_b^* \sim \mathcal{N}(m_b, \sigma_m^2 \mathbf{I}), \quad (21)$$

$$\mu_k^* \sim \mathcal{N}(\mu_k, \sigma_\mu^2 \mathbf{I}). \quad (22)$$

This density is symmetric and the relationship between the acceptance rate and the choice of the proposal window ( $\sigma_m^2$  and  $\sigma_\mu^2$ ) is relatively intuitive, the acceptance rate will decrease as the window increases.

The batch standard deviations have a support of  $(S_{loc}, \infty)$ . To ensure that proposed values remain in this range we use a Gamma proposal distribution with a shape of the current value divided by the rate, the rate set to some constant and a location of  $S_{loc}$ .

$$(S_b^*)_{p,p} \sim \mathcal{G}((S_b)_{p,p} / \beta_S, \beta_S, S_{loc}). \quad (23)$$

This proposal has an expected value of  $(S_b)_{p,p}$ . However, it is asymmetric and the acceptance rate increases as  $\beta_S$  increases. We propose all  $P$  members of  $S_b$  in each sampling step.

The class covariance matrices are the most difficult to sample. There are  $P^2$  values to propose and must be positive semi-definite. We use a Wishart proposal to satisfy this

$$\Sigma_k^* \sim \mathcal{W}(\nu_\Sigma, \Sigma_k). \quad (24)$$

All of the proposal windows,  $(\sigma_\mu^2, \sigma_m^2, \beta_S, \nu_\Sigma)$ , are tuned aiming to achieve acceptance rates in the range  $[0.1, 0.5]$  (Roberts and Rosenthal, 2001); if this is not possible we prioritise keeping acceptance rates above 0.1. This can involve multiple tuning runs of the sampler on each dataset.

## 4 Simulation study

We use a simulation study to test the model behaviour in examples where the generating model and the true labelling are known. We aim to explore

- the batch effects inferred by the model when none are present.
- the sampled distributions of the degree of freedom parameters in the mixture of multivariate t distributions.
- how the model behaves when there is some sort of inequality in the batches, e.g.,
  - different batch sizes,
  - different class representation in each batch, and
  - large difference in the magnitude of batch effects.

### 4.1 Design

Our study uses six different scenarios to test and benchmark behaviour. We use a *Base case* as the default scenario that each other scenario is a variation of. For example, the *No batch effects* scenario is the Base case with the batch means set to 0 and the batch standard deviations set to 1.0. We define each scenario by a set of parameters

- $N$  : the number of rows in the dataset,
- $P$  : the number of features in the dataset,
- $K$  : the number of classes in the dataset,
- $B$  : the number of batches in the dataset,
- $\Delta\mu_{k,p}$  : the cluster means before the batch effects,
- $\sigma_{k,p}$  : the cluster standard deviations before batch effects,
- $\pi_k$  : the expected class representations,
- $m_b$  : the batch effect on the means,
- $S_b$  : the batch effect on the standard deviations,
- $w_b$  : the expected proportion of the dataset in each batch.

We use the distance between cluster means in a single dimension, as this is the quantity of interest rather than specific values of  $\mu_k$ .

To generate the datasets, we first sample batch and class labels based on  $w_b$  and  $\pi_k$  respectively. The measurements for each point are then generated from a Gaussian distribution defined by these labels (except in the *multivariate t generated* scenario where the generating distribution is the eponymous distribution). We use a diagonal covariance matrix for simplicity. Each column generated randomly permutes the parameters associated with each class and batch; this means that the different columns can contain different information.

$$b_n \sim \text{Cat}(w), \quad (25)$$

$$c_n \sim \text{Cat}(\pi), \quad (26)$$

$$Y_n \sim \mathcal{N}(\mu_{c_n}, \Sigma_{c_n}), \quad (27)$$

$$X_n \sim \mathcal{N}(Y_n + m_{b_n}, S_{b_n}). \quad (28)$$

#### 4.1.1 Base case

The parameters defining each simulation in the scenario are

$$\begin{aligned} N &= 500, \\ P &= 2, \\ K &= 2, \\ B &= 5, \\ \Delta\mu_{k,p} &= 2, \\ \sigma_{k,p} &= 2, \\ \pi^T &= (0.75, 0.25), \\ m_b &= (-1)^b 0.5, \\ S_b &= 1.2, \\ w_b &= \frac{1}{5}. \end{aligned}$$

All the scenarios used these same parameters unless explicitly stated otherwise.

#### 4.1.2 No batch effects

This scenario is aimed at measuring the bias of the inferred batch effects. We remove the batch effects from the generating model by using values

$$\begin{aligned} m_b &= 0.0, \\ S_b &= 1.0. \end{aligned}$$

Note the inferred values of  $S$  are restricted to the open interval  $(1, \infty)$  in our sampler. Because of this we hope that the sampled batch scaling effect has a similar distribution across all batches rather than sampling a distribution centred on 1.0.

#### 4.1.3 Varying batch size

This scenario investigates the behaviour of the model when the batch sizes are very different.

$$w^T = \left( \frac{1}{2}, \frac{1}{4}, \frac{1}{8}, \frac{1}{16}, \frac{1}{16} \right). \quad (29)$$

#### 4.1.4 Varying batch effects

This scenario tests how successfully the model infers to differing batch effects in each batch, different magnitudes of batch effects (with some in the tails of the prior distribution) and the direction of the

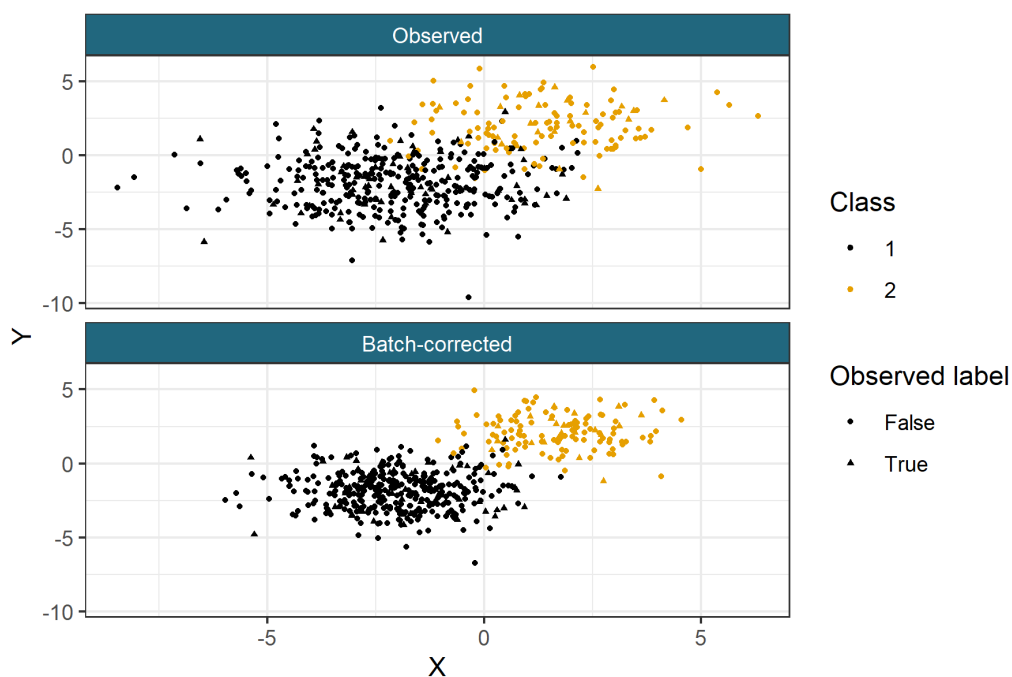

Figure 2: Example of a generated dataset from the Base case scenario.

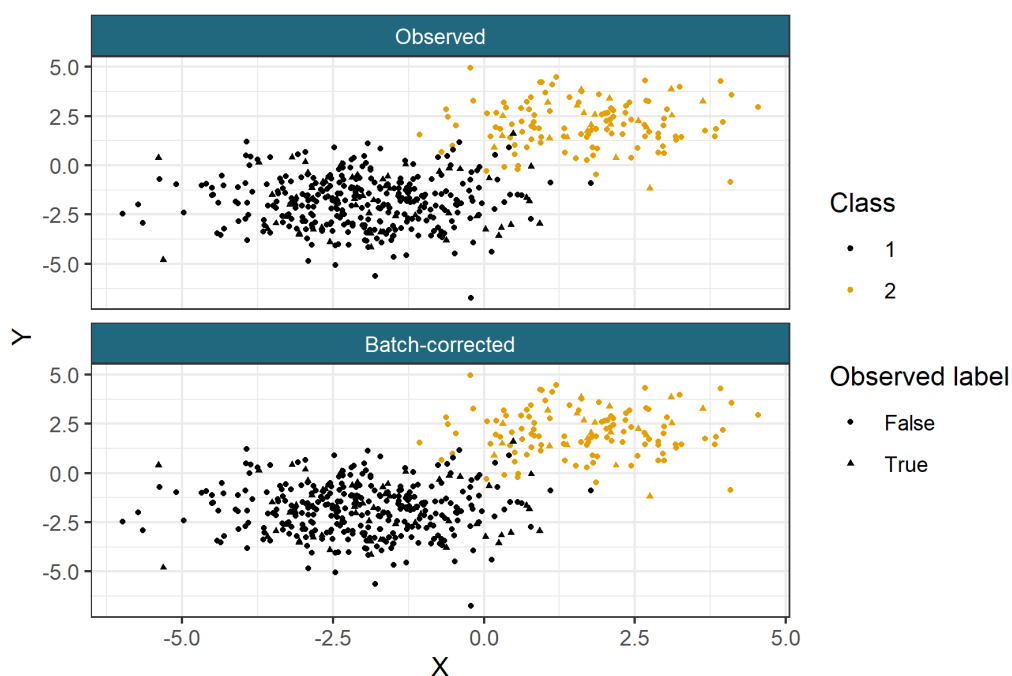

Figure 3: Example of a generated dataset from the No batch effects scenario. Note that the dataset is identical before and after batch-correction.

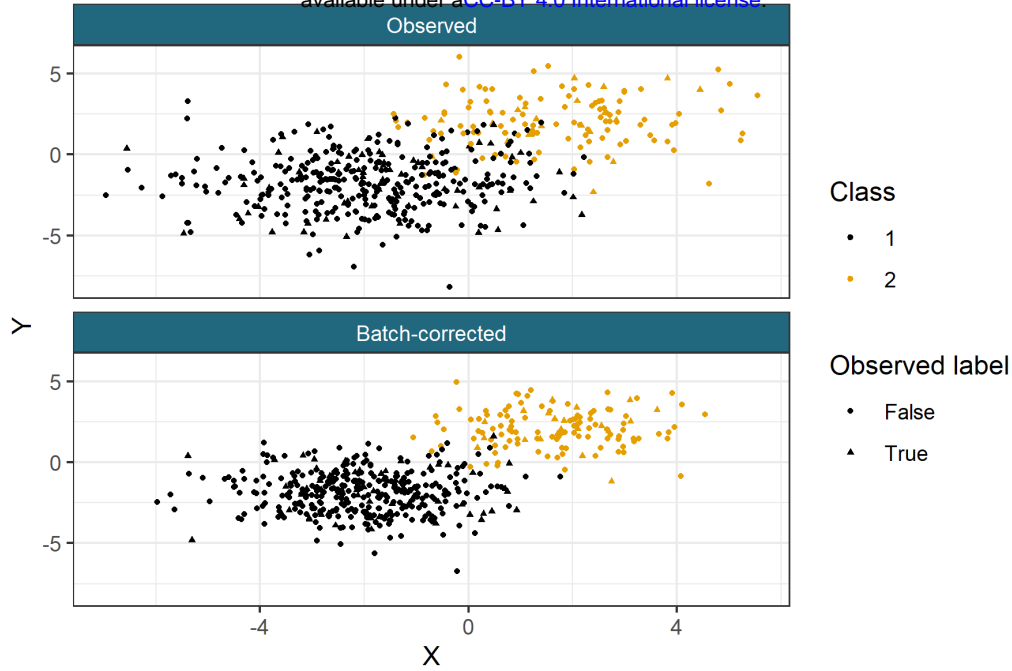

Figure 4: Example of a generated dataset from the Varying batch size scenario.

batch mean shift.

$$m_{b,p} \in [-1, -0.5, 0.0, 0.5, 1.0], \quad (30)$$

$$(S_b)p, p \in [1.1, 1.25, 1.4, 1.6, 2.0]. \quad (31)$$

#### 4.1.5 Varying class representation across batches

In this scenario we investigate how the model responds to different expected representation of classes in each batch. This scenario might apply if the batches are collected across time and the proportion of each class in the population is expected to fluctuate. In this case the expected class proportions vary across batches are therefore a  $K \times B$  matrix,

$$\pi = \begin{pmatrix} 0.7 & 0.8 & 0.5 & 0.2 & 0.1 \\ 0.3 & 0.2 & 0.5 & 0.8 & 0.9 \end{pmatrix}. \quad (32)$$

In each batch one column of this matrix is used to sample the class membership. This introduces a dependency for  $c_n$  on  $b_n$ , i.e.,

$$c_n | b_n = b, \pi \sim \text{Cat}(\pi_b). \quad (33)$$

#### 4.1.6 Multivariate t generated

This scenario generates the data from a multivariate t (**MVT**) distribution. This type of data is believed to be common in biology and we wish to investigate how well the model learns the degrees of freedom parameter and to compare the performance of the mixture of Gaussians model to the mixture of MVTs model.

$$Y_n | c_n = k \sim t_{\eta_k}(\mu_k, \Sigma_k), \quad (34)$$

$$\nu = (3, 5). \quad (35)$$

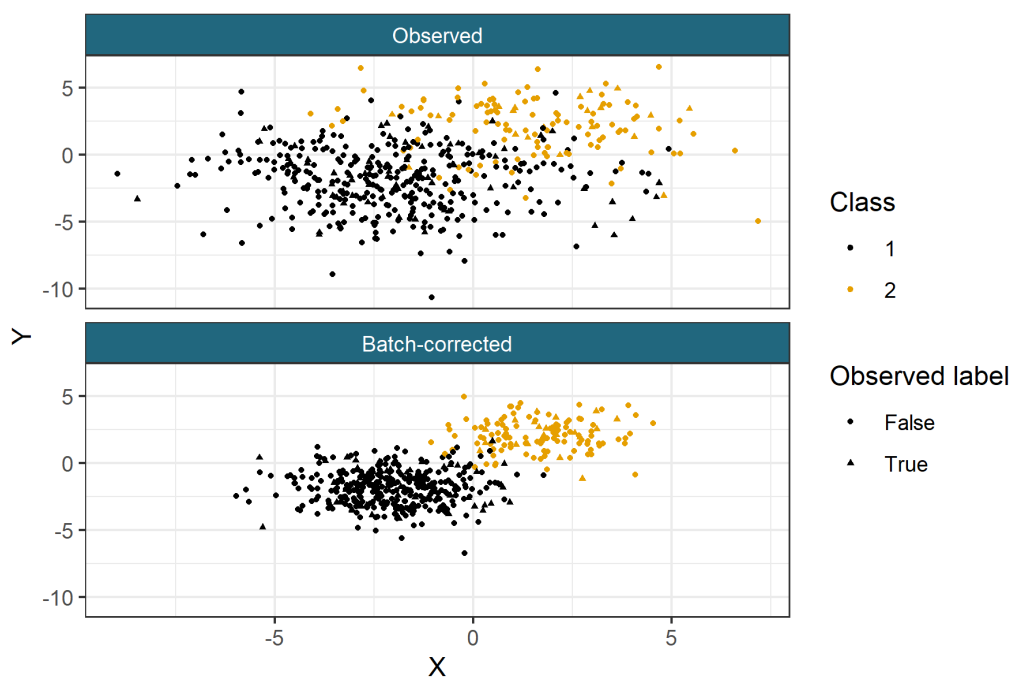

Figure 5: Example of a generated dataset from the Varying batch effects scenario.

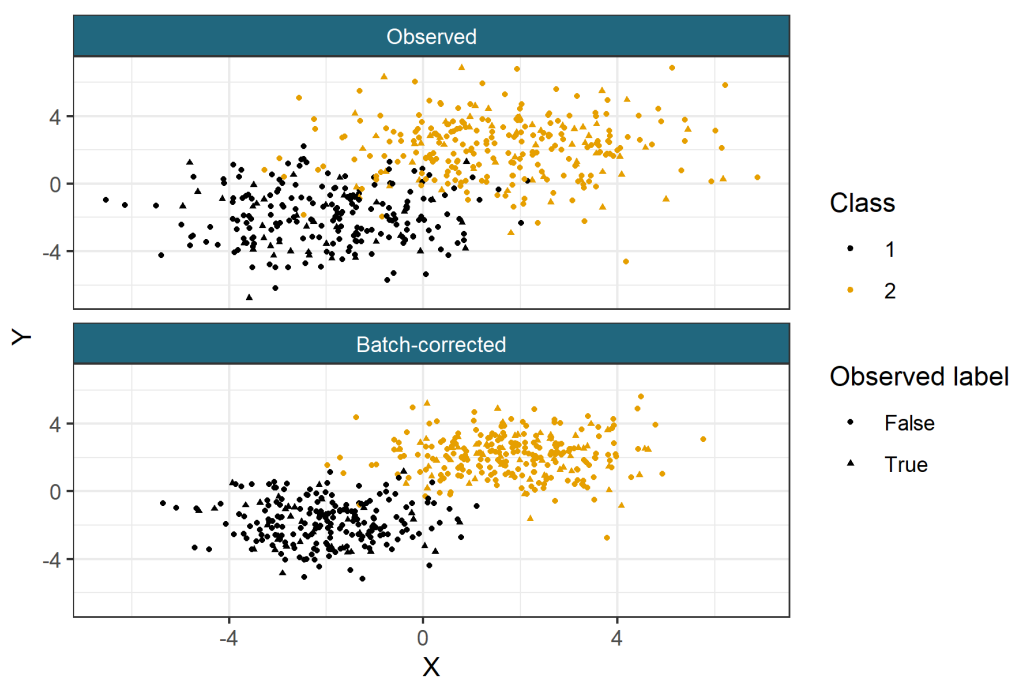

Figure 6: Example of a generated dataset from the Varying class representation across batches scenario.

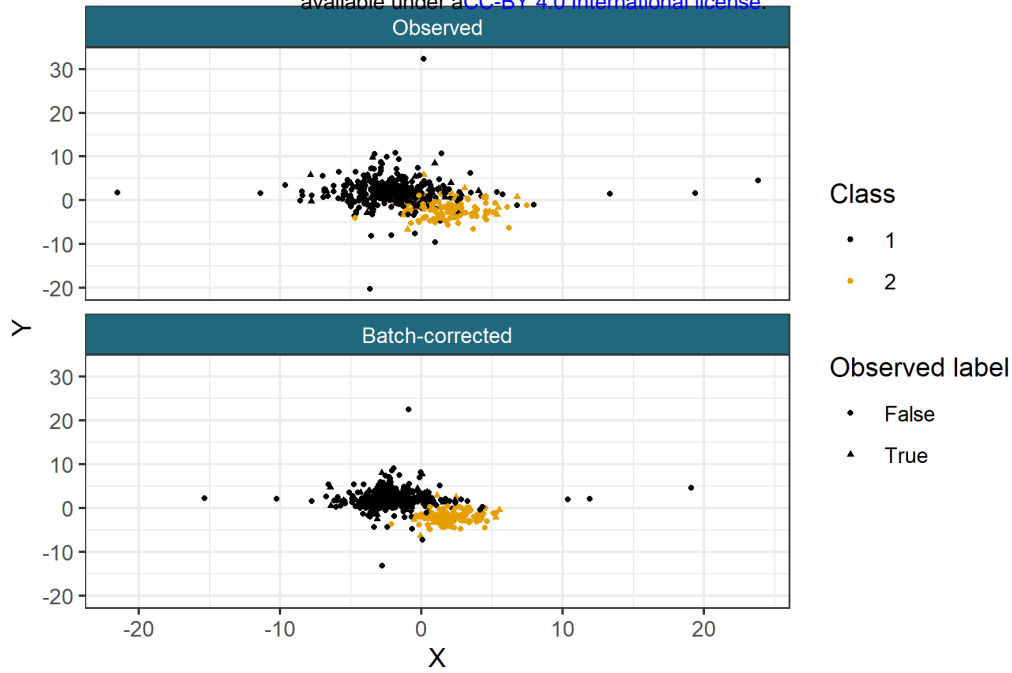

Figure 7: Example of a generated dataset from the MVT scenario.

## 5 Model convergence

For the simulated data we use the Geweke diagnostic for the complete log-likelihood after burn-in to assess within-chain convergence. We obtain a  $p$ -value by transforming the absolute value of the  $Z$ -scores with the Gaussian cumulative distribution function. We then discard all chains which have  $p$ -values below a threshold of 0.05. We then plot the complete log-likelihood and manually remove any chains that settled in a local mode. An example of this sequential reduction in chains is shown in figure 8 for the pseudo-ELISA simulation.

For the real data we visually inspect the complete log-likelihood trace plots and manually select which chains have converged to the same mode in the posterior distribution (possibly the global mode). As there are less chains performing the entire process manually is feasible for the real datasets. An example of this process is shown in figure 9.

## 6 Dopico *et al.*

Table 1 shows the seroprevalence estimate for the different methods in the data from Castro Dopico *et al.* (2021).

## 7 Pseudo-ELISA data

We use the mean posterior values from a converged chain from the MVT mixture model as the parameters to generate the ELISA-like data. For the class parameters, these are:

$$\Sigma_1 = \begin{pmatrix} 0.042 & 0.035 \\ 0.035 & 0.038 \end{pmatrix}, \quad \Sigma_2 = \begin{pmatrix} 0.086 & 0.123 \\ 0.123 & 0.195 \end{pmatrix} \quad (36)$$

$$\mu_2 = \begin{pmatrix} -2.43 \\ -2.43 \end{pmatrix}, \quad \mu_1 = \begin{pmatrix} -0.63 \\ -0.75 \end{pmatrix}, \quad (37)$$

$$\eta_1 = 7.02, \quad \eta_2 = 13.35. \quad (38)$$

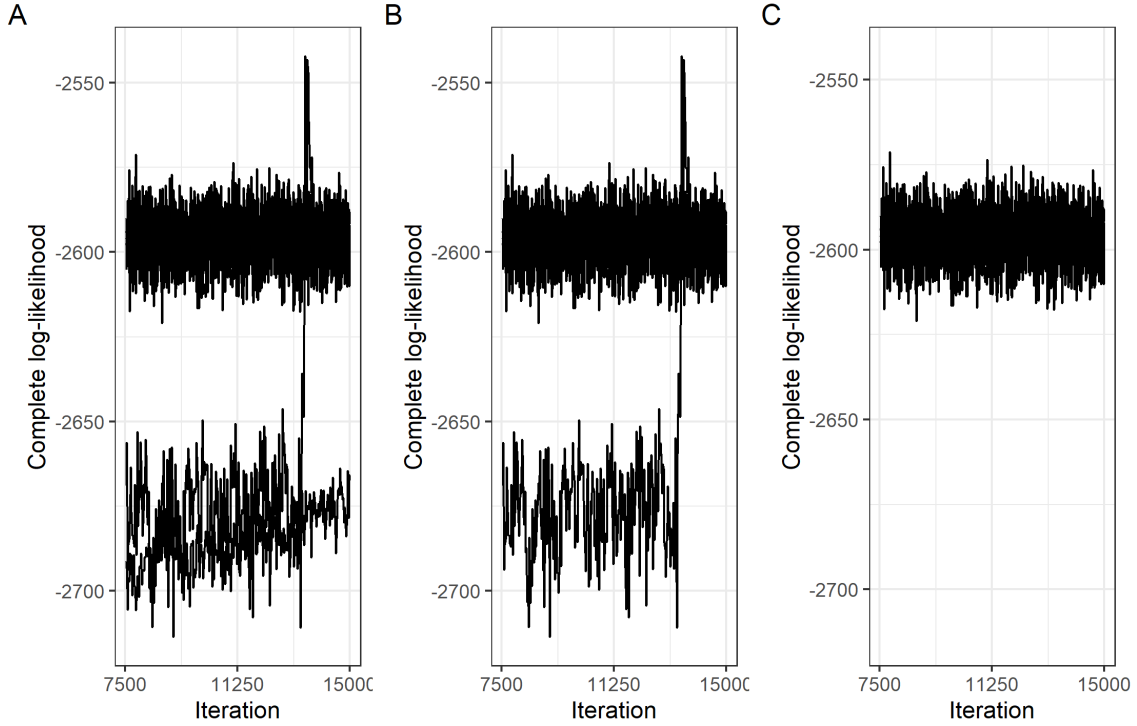

Figure 8: The complete log-likelihood for the MVN model in seventh simulation of the MVT generated data. A) All chains, B) the chains retained after using the Geweke diagnostic to assess within-chain convergence and C) the chains after manual curation.

and for the batch parameters,

$$S_1 = \begin{pmatrix} 1.28 & 0.0 \\ 0.0 & 1.21 \end{pmatrix}, \quad m_1 = \begin{pmatrix} 0.03 \\ -0.09 \end{pmatrix}, \quad (39)$$

$$S_2 = \begin{pmatrix} 1.86 & 0.0 \\ 0.0 & 1.70 \end{pmatrix}, \quad m_2 = \begin{pmatrix} 0.09 \\ -0.02 \end{pmatrix}, \quad (40)$$

$$S_3 = \begin{pmatrix} 1.36 & 0.0 \\ 0.0 & 1.28 \end{pmatrix}, \quad m_3 = \begin{pmatrix} 0.01 \\ -0.13 \end{pmatrix}, \quad (41)$$

$$S_4 = \begin{pmatrix} 1.21 & 0.0 \\ 0.0 & 1.32 \end{pmatrix}, \quad m_4 = \begin{pmatrix} 0.05 \\ -0.15 \end{pmatrix}, \quad (42)$$

$$S_5 = \begin{pmatrix} 1.58 & 0.0 \\ 0.0 & 1.40 \end{pmatrix}, \quad m_5 = \begin{pmatrix} 0.11 \\ -0.09 \end{pmatrix}, \quad (43)$$

$$S_6 = \begin{pmatrix} 1.20 & 0.0 \\ 0.0 & 1.23 \end{pmatrix}, \quad m_6 = \begin{pmatrix} 0.55 \\ 0.36 \end{pmatrix}, \quad (44)$$

$$S_7 = \begin{pmatrix} 1.25 & 0.0 \\ 0.0 & 1.26 \end{pmatrix}, \quad m_7 = \begin{pmatrix} 0.10 \\ -0.10 \end{pmatrix}. \quad (45)$$

We use the predicted proportion of each batch as our batch-specific class weights,

$$\pi = \begin{pmatrix} 0.95 & 0.87 & 0.91 & 0.88 & 0.96 & 0.10 & 0.95 \\ 0.05 & 0.13 & 0.90 & 0.12 & 0.04 & 0.90 & 0.05 \end{pmatrix}. \quad (46)$$

Each column corresponds to a batch and each row is the class weight. We denote the class weights within a batch (i.e., one of these columns) by  $\pi_b$ . The probability of being drawn from a given batch is simply the observed proportion of items in each batch.

$$w = (0.18 \quad 0.18 \quad 0.06 \quad 0.28 \quad 0.15 \quad 0.02 \quad 0.13). \quad (47)$$



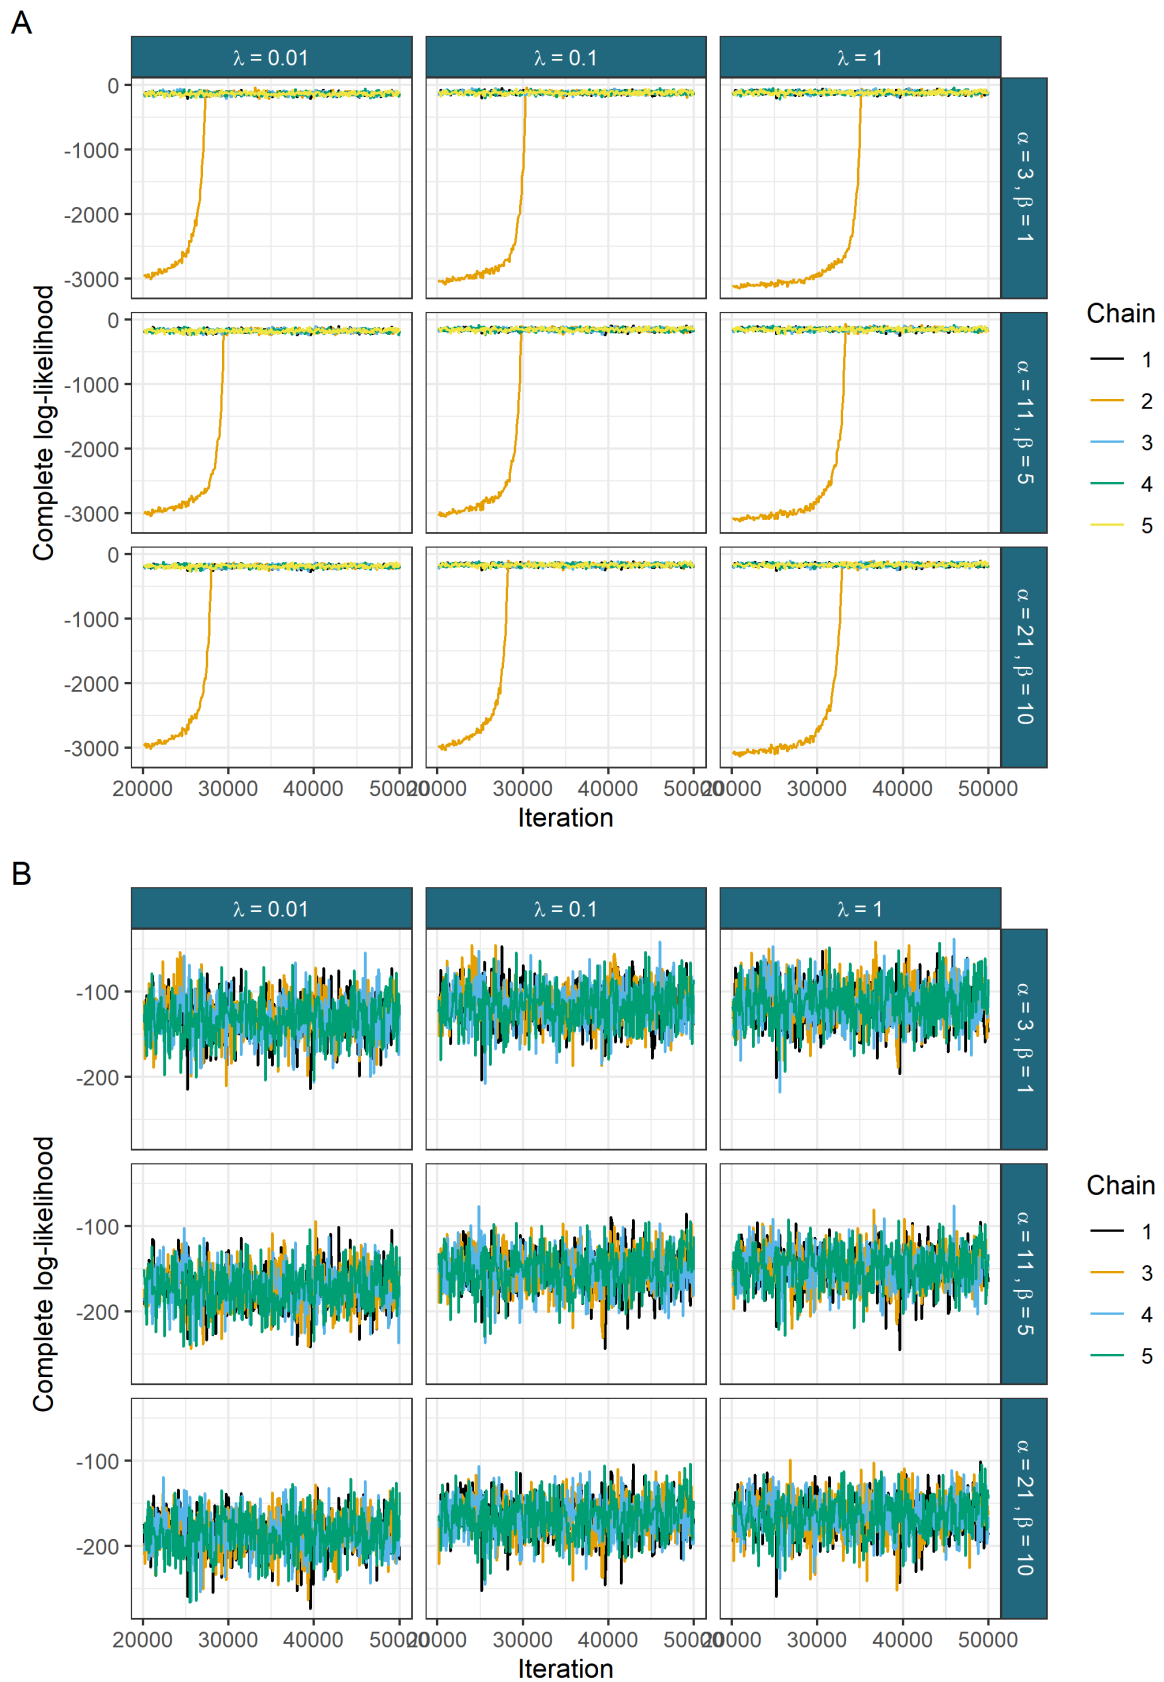

| Date       | SVM-LDA*     | Bayesian learner | MVT          | RF          | SVM          | LR          | LR - BC      |
|------------|--------------|------------------|--------------|-------------|--------------|-------------|--------------|
| 2020/04/05 | NA           | <b>2.35</b>      | 1.60         | <b>1.00</b> | <b>1.00</b>  | <b>1.00</b> | 2.00         |
| 2020/04/26 | <b>4.26</b>  | 4.73             | 4.92         | 4.50        | <b>5.00</b>  | <b>5.00</b> | <b>5.00</b>  |
| 2020/05/03 | <b>4.33</b>  | 5.34             | 5.74         | 4.50        | 4.50         | 5.00        | <b>5.50</b>  |
| 2020/05/10 | 7.87         | <b>5.86</b>      | 8.87         | 8.50        | 8.50         | 8.50        | <b>10.50</b> |
| 2020/05/17 | 7.36         | 6.28             | 8.05         | 7.50        | <b>4.50</b>  | 8.00        | <b>8.50</b>  |
| 2020/05/24 | 7.49         | 6.64             | 8.34         | 8.00        | <b>6.50</b>  | 7.50        | <b>9.50</b>  |
| 2020/05/31 | 3.54         | <b>6.97</b>      | 4.15         | 4.00        | <b>3.50</b>  | 4.00        | 5.00         |
| 2020/06/07 | 8.41         | <b>7.31</b>      | 9.83         | 9.50        | 8.00         | 10.00       | <b>10.50</b> |
| 2020/06/14 | <b>6.90</b>  | 7.75             | 7.55         | 7.00        | 7.00         | 7.00        | <b>8.50</b>  |
| 2020/06/21 | <b>6.44</b>  | <b>8.30</b>      | 7.80         | 7.00        | 6.50         | 7.50        | 8.00         |
| 2020/07/26 | 13.20        | <b>11.34</b>     | <b>16.72</b> | 15.00       | 11.50        | 16.50       | 16.00        |
| 2020/08/02 | 9.16         | <b>11.79</b>     | 10.48        | 9.00        | <b>8.50</b>  | 10.00       | 10.00        |
| 2020/08/09 | 11.30        | 12.15            | 13.43        | 12.00       | <b>8.00</b>  | 13.00       | <b>13.50</b> |
| 2020/08/16 | 10.84        | <b>12.43</b>     | 12.15        | 12.00       | <b>10.50</b> | 11.50       | 11.00        |
| 2020/08/23 | 12.97        | 12.65            | <b>15.55</b> | 15.50       | <b>11.00</b> | 15.00       | 15.00        |
| 2020/11/08 | 11.79        | <b>14.28</b>     | 13.72        | 12.00       | <b>11.50</b> | 12.50       | 14.00        |
| 2020/11/15 | <b>14.20</b> | 14.47            | <b>18.85</b> | 15.50       | 14.50        | 17.00       | 18.50        |
| 2020/11/22 | <b>13.37</b> | 14.72            | <b>16.44</b> | 15.50       | 15.50        | 15.50       | 16.00        |
| 2020/11/29 | <b>13.20</b> | 14.98            | <b>17.36</b> | 15.00       | 15.00        | 16.00       | 16.50        |
| 2020/12/06 | 11.52        | <b>15.29</b>     | 14.47        | 12.50       | <b>11.00</b> | 13.00       | 13.50        |
| 2020/12/13 | 15.73        | <b>15.64</b>     | <b>19.65</b> | 18.00       | 16.00        | 18.00       | 19.00        |

Table 1: Seroprevalence estimates across time for each method in the data from Castro Dopico et al. (2021). The highest estimates at each data are coloured orange, the lowest are coloured blue. \* from Castro Dopico et al. (2021).

We then generate a batch and class label for each item and then observed measurements conditioning on these labels, specifically for a given item index  $n$ :

$$b_n \sim \text{Cat}(w), \quad (48)$$

$$c_n | b_n = b \sim \text{Cat}(\pi_b), \quad (49)$$

$$X_n | c_n = k, b_n = b \sim t_{\eta_k}(\mu_k + m_b, \Sigma_k \oplus S_b). \quad (50)$$

For the seronegative class (we use the label of  $c_n = 1$  for this class), the  $\phi_n$  parameter indicating if the  $n^{\text{th}}$  item has an observed label is a Bernoulli random variable. For the seropositive class we introduce a bias to match the reality that it is more extreme observations that tend to have an observed label. To do this we find the most extreme value in each measurement, denoted  $X_{max}$ , (note that  $X_{max}$  is unlikely to be an observed value) and calculate the Euclidean distance between this and our observed values. We then sample  $\phi$  according to:

$$p(\phi_n = 1 | c_n = 1) = p(1 - p), \quad (51)$$

$$p(\phi_n = 1 | c_n = 2) = p(1 - p) \exp\{-d(X_n, X_{max})\}, \quad (52)$$

where  $p = \frac{1}{3}$ . This values is chosen as the proportion of observed labels to the predicted labels is 0.332 for the seronegative class and 0.241 for the seropositive class. Our sampling process finds provides less observed seropositive labels than we have in the real data (the ratio of observed labels to true labels for the seropositive class had a mean of 0.16 across 500 simulated datasets), but we think representing the bias in the positive controls is more important than acquiring the exact proportion of training data.

## References

- X. Castro Dopico, S. Muschiol, M. Christian, L. Hanke, D. J. Sheward, N. F. Grinberg, J. Rorbach, G. Bogdanovic, G. M. Mcinerney, T. Allander, C. Wallace, B. Murrell, J. Albert, and G. B. Karlsson Hedestam. Seropositivity in blood donors and pregnant women during the first year of SARS-CoV-2 transmission in Stockholm, Sweden. *Journal of Internal Medicine*, May 2021. ISSN 1365-2796. doi: 10.1111/joim.13304.

Chris Fraley and Adrian E Raftery. Bayesian Regularization for Normal Mixture Estimation and Model-Based Clustering. *Journal of Classification*, 24(2):27, September 2007.

Stuart Geman and Donald Geman. Stochastic Relaxation, Gibbs Distributions, and the Bayesian Restoration of Images. *IEEE Transactions on Pattern Analysis and Machine Intelligence*, PAMI-6(6):721–741, November 1984. ISSN 1939-3539. doi: 10.1109/TPAMI.1984.4767596. Conference Name: IEEE Transactions on Pattern Analysis and Machine Intelligence.

W. K. Hastings. Monte Carlo sampling methods using Markov chains and their applications. *Biometrika*, 57(1):97–109, April 1970. ISSN 0006-3444. doi: 10.1093/biomet/57.1.97. URL <https://doi.org/10.1093/biomet/57.1.97>.

Miguel A. Juárez and Mark F. J. Steel. Model-Based Clustering of Non-Gaussian Panel Data Based on Skew-  $t$  Distributions. *Journal of Business & Economic Statistics*, 28(1):52–66, January 2010. ISSN 0735-0015, 1537-2707. doi: 10.1198/jbes.2009.07145. URL <http://www.tandfonline.com/doi/abs/10.1198/jbes.2009.07145>.

Nicholas Metropolis, Arianna W. Rosenbluth, Marshall N. Rosenbluth, Augusta H. Teller, and Edward Teller. Equation of State Calculations by Fast Computing Machines. *The Journal of Chemical Physics*, 21(6):1087–1092, June 1953. ISSN 0021-9606. doi: 10.1063/1.1699114. URL <https://aip.scitation.org/doi/abs/10.1063/1.1699114>. Publisher: American Institute of Physics.

Gareth O. Roberts and Jeffrey S. Rosenthal. Optimal scaling for various Metropolis-Hastings algorithms. *Statistical Science*, 16(4):351–367, November 2001. ISSN 0883-4237, 2168-8745. doi: 10.1214/ss/1015346320. URL <https://projecteuclid.org/journals/statistical-science/volume-16/issue-4/Optimal-scaling-for-various> Publisher: Institute of Mathematical Statistics.
